# 1 **False discovery rates of *qpAdm*-based screens for genetic admixture**

2 Eren Yüncü<sup>1,\*†</sup>, Ulaş Işıldak<sup>1,\*†</sup>, Matthew P. Williams<sup>2</sup>, Christian D. Huber<sup>2</sup>, Leonid A.

3 Vyazov<sup>1</sup>, Piya Changmai<sup>1</sup>, Pavel Flegontov<sup>1,3,§</sup>

4

5 <sup>1</sup> *Department of Biology and Ecology, Faculty of Science, University of Ostrava, Ostrava,*  
6 *Czechia*

7 <sup>2</sup> *Department of Biology, Eberly College of Science, Pennsylvania State University, PA, USA*

8 <sup>3</sup> *Department of Human Evolutionary Biology, Harvard University, Cambridge, MA, USA*

9

10 \* the authors contributed equally

11 † present addresses: E.Y., Department of Biological Sciences, Middle East Technical  
12 University, Ankara, Turkey; U.I., Leibniz Institute on Aging - Fritz Lipmann Institute (FLI),  
13 Jena, Germany.

14 § Correspondence to: Pavel Flegontov

15 (pavel.flegontov@osu.cz, pavel\_flegontov@hms.harvard.edu)

16

## 17 Abstract

18 Although a broad range of methods exists for reconstructing population history from  
19 genome-wide single nucleotide polymorphism data, just a few methods gained popularity in  
20 archaeogenetics: principal component analysis (PCA); *ADMIXTURE*, an algorithm that models  
21 individuals as mixtures of multiple ancestral sources represented by actual or inferred  
22 populations; formal tests for admixture such as  $f_3$ -statistics and  $D$ -statistics; and *qpAdm*, a  
23 tool for fitting two-component and more complex admixture models to groups or individuals.  
24 Despite their popularity in archaeogenetics, which is explained by modest computational  
25 requirements and ability to analyse data of various types and qualities, protocols relying on  
26 *qpAdm* that screen numerous alternative models of varying complexity and find “fitting”  
27 models (often considering both estimated admixture proportions and  $p$ -values as a  
28 composite criterion of model fit) remain untested on complex simulated population histories  
29 in the form of admixture graphs of random topology. We analysed genotype data extracted  
30 from such simulations and tested various types of high-throughput *qpAdm* protocols  
31 (“rotating” and “non-rotating”, with or without temporal stratification of target groups and  
32 proxy ancestry sources, with or without a “model competition” step). We caution that these  
33 *qpAdm* protocols may be inappropriate for exploratory analyses in poorly studied  
34 regions/periods since their false discovery rates varied between 12% and 68% depending on  
35 the details of the protocol and on the amount and quality of simulated data (i.e., >12% of  
36 fitting two-way admixture models imply gene flows that were not simulated), although our  
37 study has a number of limitations. We demonstrate that for reducing false discovery rates of  
38 *qpAdm* protocols to nearly 0% it is advisable to use large SNP sets with low missing data rates,  
39 the rotating *qpAdm* protocol with a strictly enforced rule that target groups do not pre-date  
40 their proxy sources, and an unsupervised *ADMIXTURE* analysis as a way to verify feasible  
41 *qpAdm* models.

42

## 43 Introduction

44 Although a broad range of methods exists for reconstructing population history from  
45 genome-wide autosomal single nucleotide polymorphism (SNP) data, just a few methods  
46 became the cornerstone of archaeogenetic studies: principal component analysis (PCA)  
47 (Patterson et al. 2006); an unsupervised or supervised algorithm for admixture inference in  
48 individuals, *ADMIXTURE* (Alexander et al. 2009); formal tests for admixture such as  $f_3$ -  
49 statistics (Patterson et al. 2012, Peter 2016, Soraggi and Wiuf 2019) and *D*-statistics (Green  
50 et al. 2010, Durand et al. 2011); and a tool for fitting two-component and more complex  
51 admixture models to populations, *qpAdm* (Haak et al. 2015, Harney et al. 2021). The  
52 popularity of these methods is explained by their relatively modest computational  
53 requirements and versatility since they are capable of analysing unphased biallelic genotype  
54 data of various types (pseudo-haploid or diploid), generated using either targeted enrichment  
55 on a panel of sites or shotgun sequencing technologies, and low-coverage ancient genomes  
56 with high proportions of missing data (Harney et al. 2021). However, only a few studies were  
57 devoted to testing the performance of these diverse methods on simulated genetic data  
58 (Alexander et al. 2009, Harney et al. 2021, Lazaridis et al. 2017, Martin et al. 2014, McVean  
59 2009, Moreno-Mayar et al. 2018b, Ning et al. 2020, Soraggi and Wiuf 2019), and realistically  
60 complex population histories remain virtually unexplored in this respect.

61 In a typical archaeogenetic study published since the 2010s, PCA is used as a first line of  
62 analysis, providing an overview of population structure and helping to propose hypotheses  
63 about migration and admixture. Distribution of individual genomes in two- or higher  
64 dimensional spaces of principal components (PCs) does not have an unambiguous  
65 interpretation since even under ideal conditions (in the absence of missing data, batch  
66 artefacts, and selection signals) it is affected by both genetic drift and admixture (McVean  
67 2009). Nevertheless, if context information such as geographical coordinates and dates for  
68 ancient individuals is available, PCA is routinely used for revealing “genetic clines” interpreted  
69 as signs of admixture between originally isolated groups at the ends of such clines. However,  
70 a study on simulated data by Novembre and Stephens (2008) concluded that clinal PCA  
71 patterns do not necessarily indicate historical migration events; these patterns generally  
72 emerge because of decrease in genetic similarity with distance. PC1 vs. PC2 scatterplots were

73 also shown to display an arch-shaped artefact, a "horseshoe" (Podani and Miklós 2002),  
74 under the homogeneous migration scenario (Novembre and Stephens 2008, Frichot et al.  
75 2012). It was demonstrated that the distribution of individuals in the PC space depends on  
76 the expected coalescent time (McVean 2009), hence distinct demographic models with the  
77 same expected coalescence times are expected to have the same PCA projections.  
78 Additionally, imbalanced sampling across genetically divergent populations affects PCA  
79 results substantially (McVean 2009). Hence, using further methods to correlate PCA results  
80 with other lines of evidence is necessary for studying migration history (Reich et al. 2008).

81 Formal tests for genetic admixture such as  $f_3$ -statistics and  $D/f_4$ -statistics are often used  
82 exactly for this purpose: to prove that a certain cline spotted in PC space is a result of  
83 migration and admixture of previously isolated ancestries and does not reflect isolation by  
84 distance or recurrent bottlenecks.  $D$ - and  $f_4$ -statistics, which are identical except for the  
85 denominator and are not affected by genetic drift, test if an unrooted four-population tree  
86 fits the data (Reich et al. 2009, Green et al. 2010, Durand et al. 2011, Patterson et al. 2012).  
87 A statistically significant deviation of the statistic from 0 (estimated using jackknife or  
88 bootstrap resampling) means that either the assumed tree topology is wrong, or gene flow  
89 occurred between a pair of branches in the tree, assuming that recurrent mutations and SNP  
90 ascertainment bias are absent (Durand et al. 2011, Patterson et al. 2012). However,  
91 interpretation of these statistics is ambiguous since gene flow directionality remains  
92 unknown, and two pairs of branches can be responsible for a deviation of the statistic from 0  
93 (Lipson 2020). Since gene flow may be mediated by ghost groups related only distantly to the  
94 sampled groups at the branch tips (Tricou et al. 2022), excluding one pair of branches due to  
95 geographical and temporal plausibility of gene flow is also difficult. And interpretation of  
96 deviations of  $D$ - and  $f_4$ -statistics from 0 becomes hardly possible if both branch pairs are  
97 connected by detectable gene flows.

98 "Admixture"  $f_3$ -statistics of the form  $f_3(\text{target}; \text{proxy source}_1, \text{proxy source}_2)$  constitute  
99 another formal test for admixture (Patterson et al. 2012). Significant deviation of such a  
100 statistic from 0 in the negative direction (Z-score below -3) is considered proof of admixture  
101 since allele frequencies at most sites are intermediate in the target group between those in  
102 the proxy sources (Patterson et al. 2012). However, "admixture"  $f_3$ -statistics are usually only  
103 applicable for detection of recent admixture events since they become positive when post-

104 admixture genetic drift on the target lineage moves allele frequencies away from these  
105 intermediate values (Patterson et al. 2012, Peter 2016).

106 Considering these complications, more sophisticated tests for genetic admixture are needed.  
107 The *qpAdm* method introduced by Haak *et al.* (2015) is based on matrices of  $f_4$ -statistics and  
108 does not require detailed knowledge of population phylogeny beyond a few assumptions  
109 (Lazaridis et al. 2016, Harney et al. 2021). This method tests admixture models in the form of  
110 combinations of proxy ancestral groups ("sources" or "references", Lazaridis et al. 2016) for  
111 a "target" (or "test") population, given a genetically diverse set of "outgroup" populations,  
112 and infers ancestry proportions in the target group contributed by the lineages represented  
113 by the proxy sources ("outgroups" are often termed "right" populations for convenience since  
114 they are usually not outgroups in the phylogenetic sense, and they were termed "references"  
115 by Harney *et al.* 2021). See Box 1 for definitions of various *qpAdm*-related terms.

116 **Box 1.** Terminology used in this study for describing admixture models, results of screens for  
117 admixture, and *qpAdm* protocols.

|                                          |                                                                                                                                                                                                                                                                                                                                                    |
|------------------------------------------|----------------------------------------------------------------------------------------------------------------------------------------------------------------------------------------------------------------------------------------------------------------------------------------------------------------------------------------------------|
| "right" (or outgroup) populations/groups | In a <i>qpAdm</i> protocol, these are reference populations needed for testing admixture models composed of a target and one or several proxy source groups.                                                                                                                                                                                       |
| target (or test) population/group        | In an admixture model, this is a population/group whose genetic history is being modelled.                                                                                                                                                                                                                                                         |
| true (ancestry) source                   | In the context of simulated admixture graphs, this is a population directly participating in an admixture event(s) giving rise to a target group, and its ancestral (unsampled) population before its merging with other populations.                                                                                                              |
| proxy (ancestry) source                  | In the context of simulated admixture graphs, this is a sampled population included in an admixture model as a potential source and assumed to be cladal with one of true ancestry sources.                                                                                                                                                        |
| model complexity                         | Number of proposed proxy ancestry sources in an admixture model "target = proxy source <sub>1</sub> + proxy source <sub>2</sub> + ... proxy source <sub>i</sub> ".                                                                                                                                                                                 |
| "left" populations/groups                | In a <i>qpAdm</i> model, these are proxy sources and a target.                                                                                                                                                                                                                                                                                     |
| reference populations/groups             | "Right" and proxy source populations combined.                                                                                                                                                                                                                                                                                                     |
| (composite) model feasibility criterion  | A criterion for identifying fitting (feasible) <i>qpAdm</i> models that relies on both estimated admixture proportions and the $p$ -value. The following criterion was used in this study (all the conditions listed below should be satisfied): 1) $p$ -values for all models with $n-1$ ancestry sources, such as one-way models "target = proxy |

|                                          |                                                                                                                                                                                                                                                                                                                                                                                                                                                                                                                                                                                                                                                                                                                                                                                                 |
|------------------------------------------|-------------------------------------------------------------------------------------------------------------------------------------------------------------------------------------------------------------------------------------------------------------------------------------------------------------------------------------------------------------------------------------------------------------------------------------------------------------------------------------------------------------------------------------------------------------------------------------------------------------------------------------------------------------------------------------------------------------------------------------------------------------------------------------------------|
|                                          | <p>source<sub>1</sub>", "target = proxy source<sub>2</sub>", and "proxy source<sub>1</sub> = proxy source<sub>2</sub>", are all below 0.01; 2) for a model with <math>n</math> ancestry sources, such as a two-way model "target = proxy source<sub>1</sub> + proxy source<sub>2</sub>", estimated admixture proportions <math>\pm 2</math> standard errors are between 0 and 1; 3) the <math>p</math>-value for a model with <math>n</math> ancestry sources <math>\geq 0.01</math>. Other versions of this criterion are also found in the literature: with different values of the <math>p</math>-value cut-off and/or not considering standard errors of estimated admixture proportions.</p>                                                                                               |
| feasible (or fitting) <i>qpAdm</i> model | A <i>qpAdm</i> model satisfying the feasibility criterion above.                                                                                                                                                                                                                                                                                                                                                                                                                                                                                                                                                                                                                                                                                                                                |
| positive/negative admixture model        | An admixture model supported/not supported by one or several analytical tools such as <i>qpAdm</i> , PCA, ADMIXTURE.                                                                                                                                                                                                                                                                                                                                                                                                                                                                                                                                                                                                                                                                            |
| false discovery rate (FDR)               | The fraction of admixture models of a certain complexity (e.g., two-way) satisfying the <i>qpAdm</i> model feasibility criteria but classified as false considering the simulated graph topology and simulated admixture proportions. For topological criteria used for classifying two-way admixture models into true and false ones see the Results and Methods sections. The term is also applied to outcomes of more complex admixture inference pipelines composed of several methods.                                                                                                                                                                                                                                                                                                     |
| false omission rate (FOR)                | The fraction of feasible <i>qpAdm</i> models that are classified as true considering the simulated graph topology and simulated admixture proportions but are not supported by another method ( <i>qpAdm</i> model competition, PCA, or ADMIXTURE) or a combination of methods.                                                                                                                                                                                                                                                                                                                                                                                                                                                                                                                 |
| "rotating" <i>qpAdm</i> protocol         | A protocol having the following feature: a large subset of reference populations or all of them are distributed between the "right" and "left" sets according to the principle "whatever is not in the left set is in the right set", testing all possible bisections of this sort for a given rotated set and a given range of model complexities. In the most extreme case, target groups are also included in this rotation. Model testing starts from the simplest one-way models and moves on to the next complexity level if all simple models for a given target are rejected according to the composite feasibility criterion. The goal of this approach, as compared to "non-rotating" protocols, is to increase the power of the method to reject non-optimal proxy ancestry sources. |
| "non-rotating" <i>qpAdm</i> protocol     | This protocol we also term "standard" or "basic": all models are tested with one or few fixed sets of "right" groups which usually pre-date "left" groups or are contemporaneous with them. In practice, modern populations genetically divergent from the target are often included in such a "right" set if ancient reference groups are unavailable. Model testing starts from the simplest one-way models and moves on to the next complexity level if all                                                                                                                                                                                                                                                                                                                                  |

|                                                      |                                                                                                                                                                                                                                                                                                                                                                                                                                                                                                                                                                                                                                                                                                  |
|------------------------------------------------------|--------------------------------------------------------------------------------------------------------------------------------------------------------------------------------------------------------------------------------------------------------------------------------------------------------------------------------------------------------------------------------------------------------------------------------------------------------------------------------------------------------------------------------------------------------------------------------------------------------------------------------------------------------------------------------------------------|
|                                                      | simple models for a given target are rejected according to the composite feasibility criterion.                                                                                                                                                                                                                                                                                                                                                                                                                                                                                                                                                                                                  |
| temporal stratification of targets and proxy sources | A requirement that target groups post-date or are contemporaneous with all proxy sources in each model. In practice, this requirement is often included in rotating and non-rotating <i>qpAdm</i> protocols.                                                                                                                                                                                                                                                                                                                                                                                                                                                                                     |
| “distal” <i>qpAdm</i> protocol                       | A rotating or non-rotating <i>qpAdm</i> protocol with temporal stratification of targets and proxy sources.                                                                                                                                                                                                                                                                                                                                                                                                                                                                                                                                                                                      |
| “proximal” <i>qpAdm</i> protocol                     | A rotating or non-rotating <i>qpAdm</i> protocol without temporal stratification of targets and proxy sources.                                                                                                                                                                                                                                                                                                                                                                                                                                                                                                                                                                                   |
| model competition                                    | A <i>qpAdm</i> protocol which starts from sets of alternative feasible <i>qpAdm</i> models of a certain complexity level for a given target, outcomes of a non-rotating protocol. Alternative proxy sources from these models form a rotated set. Rotation can be performed in two ways (groups from the rotated set are placed in the “left” set one by one, and the other groups from the rotated set are placed in the “right” set; or groups from the rotated set are placed in both “left” and “right” sets one by one), and the composite feasibility criterion is applied. The goal of this approach is to increase the power of the method to reject non-optimal proxy ancestry sources. |
| proximal model competition <i>qpAdm</i> protocol     | As introduced by Narasimhan <i>et al.</i> (2019), this is a non-rotating <i>qpAdm</i> protocol with temporal stratification of “right” and “left” sets, with a subsequent model competition step, and with no (or very limited) temporal stratification of targets and proxy sources at both steps.                                                                                                                                                                                                                                                                                                                                                                                              |

118

119 Eight years later we find *qpAdm*-based protocols routinely employed in large-scale screens of  
120 ancient human or animal populations for admixture (often between closely related sources)  
121 and used as formal tests for admixture (see Lazaridis *et al.* 2016, Skoglund *et al.* 2017, Harney  
122 *et al.* 2018, Mathieson *et al.* 2018, Antonio *et al.* 2019, Narasimhan *et al.* 2019, Fernandes *et al.*  
123 *et al.* 2020, Marcus *et al.* 2020, Ning *et al.* 2020, Wang *et al.* 2020, Yang *et al.* 2020, Calhoff *et al.*  
124 *et al.* 2021, Papac *et al.* 2021, Librado *et al.* 2021, Sirak *et al.* 2021, Wang *et al.* 2021, Yaka *et al.*  
125 2021, Zhang *et al.* 2021, Allentoft *et al.* 2022, Bergström *et al.* 2022, Changmai *et al.* 2022a,  
126 Changmai *et al.* 2022b, Gneccchi-Ruscione *et al.* 2022, Lazaridis *et al.* 2022, Maróti *et al.* 2022,  
127 Oliveira *et al.* 2022, Patterson *et al.* 2022, Brielle *et al.* 2023, Lee *et al.* 2023, Taylor *et al.* 2023  
128 for examples). *qpAdm* fits admixture models to a matrix of  $f_4$ -statistics of the form  $f_4(\text{"left"}$   
129  $\text{group}_i, \text{"left" group}_j; \text{"right" group}_i, \text{"right" group}_j)$ , which in the absence of missing data at

130 the group level can be reduced to a smaller matrix  $f_4$ (target group, "left" group; "right"  
 131 group<sub>1</sub>, "right" group)), considering algebraic relationships between different  $f_4$ -statistics  
 132 (Peter 2016).

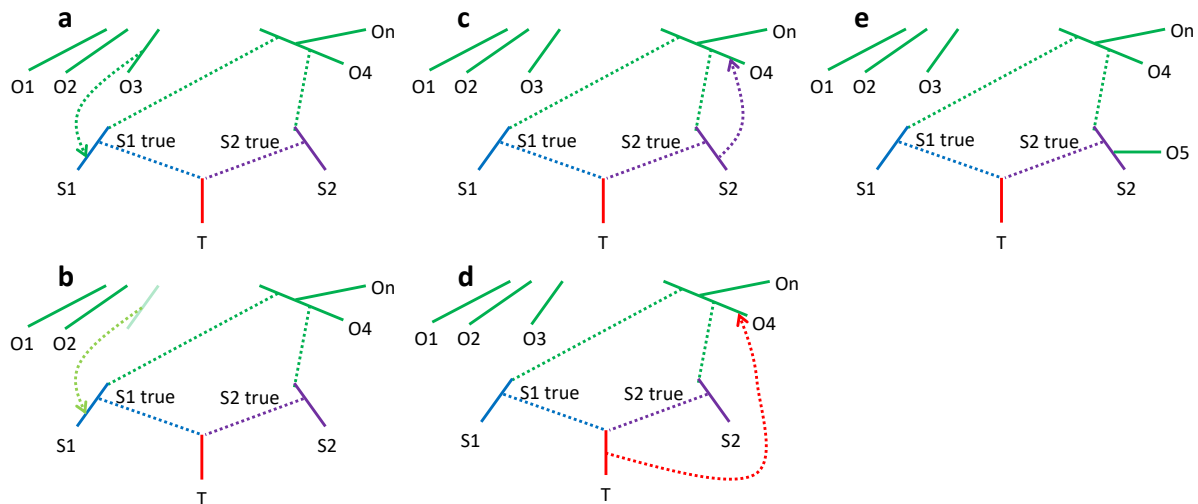

133

if other OG are differentially related to O3

134 **Figure 1.** Admixture graphs showing an exhaustive list of assumption violations of the standard *qpAdm*  
 135 protocol that may lead to rejection of the true simple model, and thus prompt the researcher to test  
 136 overly complex models. (a) A gene flow from an outgroup O\* to a proxy source after the divergence  
 137 of the latter from the true source. (b) A gene flow from an unsampled source to a proxy source  
 138 after the divergence of the latter from the true source. This case is problematic only if the outgroups  
 139 are differentially related to the unsampled source. (c) A gene flow from a proxy source to an outgroup  
 140 after the divergence of the former from the true source. (d) A gene flow from a target to an outgroup.  
 141 (e) An outgroup is cladal with a proxy source.

142

143 A *qpAdm* protocol that has become the standard in archaeogenetics (Lazaridis et al. 2016)  
 144 can be broken down into two parts: estimation of the number of gene flows connecting the  
 145 "right" and "left" sets (this method was first published as a tool named "*qpWave*", Reich et  
 146 al. 2012) and inference of admixture proportions in a target group in the "left" set (Haak et  
 147 al. 2015). *qpWave* tests for the number of distinct gene flows connecting the "right" and "left"  
 148 population sets, does not infer directionality of gene flows, and does not identify recipients  
 149 of gene flow in the "left" or "right" population sets. Notably, the standard *qpAdm* protocol  
 150 relies on the following assumptions (Lazaridis et al. 2016, Harney et al. 2021): 1) there is at  
 151 least one "right" population differentially related to the proxy sources; 2) proxy sources are  
 152 strictly cladal with the true ancestral admixing sources (Fig. 1a,b), 3) there are no gene flows  
 153 to populations located in the "right" set from the proxy source or target lineages either after



154 the split of the proxy source from the true admixing source population or between the target  
155 population and the admixture event that gave rise to it (Fig. 1c-e);. In the context of our study,  
156 true sources are unsampled populations that participated in a simulated admixture event  
157 (labelled as “S1 true” and “S2 true” in Fig. 1, see also Box 1).

158 If the above assumptions are satisfied, it is safe to say that *qpWave/qpAdm* rejections of  
159 simpler models, and a failure to reject more complex models, are the result of a genuinely  
160 complex admixture history that connects the source and target populations rather than the  
161 false rejection of the simple model due to violations of any one of the assumptions described  
162 above. Most notably, violations of the second or third assumptions raise the probability of  
163 rejecting a simpler (true) model and prompt the researcher to test more complex (false)  
164 models (such as in Fig. 1 rejecting a two-source *qpAdm* model and exploring three-source  
165 models).

166 Harney *et al.* (2021) demonstrated on simulated data that, if the *qpAdm* assumptions are  
167 satisfied, it is highly favourable for statistical power of the method (for distinguishing  
168 between alternative proxy sources that are unequally distant genetically from the true  
169 ancestry source) to move at least some alternative proxy sources between the "left" and  
170 "right" sets. In other words, having "on the right" populations that do not violate the  
171 topological assumptions of *qpAdm*, but are closely related to proxy sources on the "left",  
172 increases the statistical power greatly (see also Ning *et al.* 2020 for another demonstration  
173 of this on simple simulated histories).

174 This new type of *qpAdm* protocols, termed "rotating" protocol, has been adopted in  
175 archaeogenetics widely (see, e.g., Skoglund *et al.* 2017, Harney *et al.* 2019, Narasimhan *et al.*  
176 2019, Olalde *et al.* 2019, Calhoff *et al.* 2021, Fernandes *et al.* 2021, Librado *et al.* 2021,  
177 Allentoft *et al.* 2022, Bergström *et al.* 2022, Lazaridis *et al.* 2022, Oliveira *et al.* 2022, Taylor  
178 *et al.* 2023). The most extreme version of the "rotating" protocol simply divides a set of  
179 reference populations into all possible combinations of "right" and "proxy source" subsets of  
180 certain sizes and rotates these combinations through successive *qpAdm* analyses. Additional  
181 constraints can be placed on the rotating combinations such as restricting a set of groups  
182 (usually highly divergent from the target) to remain in the “right” set in all models. When  
183 evaluating the totality of multiple *qpAdm* tests, the simplest feasible models (e.g., one-way,

184 i.e., unadmixed) are favoured, and increasingly complex models are explored upon the  
185 rejection of simpler models. Model rejection for the simplest models is made according to a  
186 chosen  $p$ -value threshold such that *qpAdm* models are considered feasible or "fitting" the  
187 data when the  $p$ -value is above such a threshold (Skoglund et al. 2017, Harney et al. 2018,  
188 Narasimhan et al. 2019, Olalde et al. 2019, Yang et al. 2020, Calhoff et al. 2021, Fernandes et  
189 al. 2021, Librado et al. 2021, Zhang et al. 2021, Allentoft et al. 2022, Bergström et al. 2022,  
190 Lazaridis et al. 2022, Oliveira et al. 2022, Taylor et al. 2023). As an additional criterion of a  
191 fitting model, all inferred admixture proportions (Harney et al. 2018, Olalde et al. 2019, Yang  
192 et al. 2020, Zhang et al. 2021, Allentoft et al. 2022, Lazaridis et al. 2022, Oliveira et al. 2022),  
193 or proportions  $\pm 2$  standard errors (Narasimhan et al. 2019), may be required to lie between  
194 0 and 1. It is important to remember that the statistical significance of the *qpAdm/qpWave*  
195 test is, strictly speaking, a function of model rejection, and thus the failure to reject a model  
196 may have underlying causes other than approximating the true situation well enough (such  
197 as lack of statistical power or a lack of suitable "right" groups that capture the divergent  
198 ancestry sources amongst the "left" group).

199 A less exhaustive version of the rotating *qpAdm* protocol, termed "model competition" (e.g.,  
200 Narasimhan et al. 2019, Fernandes et al. 2020, Calhoff et al. 2021, Sirak et al. 2021, Zhang et  
201 al. 2021, Maróti et al. 2022, Brielle et al. 2023, Lee et al. 2023), is used even more widely than  
202 the basic rotating protocol. It involves an initial (standard non-rotating) *qpAdm* analysis on a  
203 number of source populations (see Box 1). Upon identifying a sub-list of plausible sources for  
204 a target, the algorithm re-tests feasible models for this target rotating these plausible sources  
205 between the "left" and "right" sets with the expectation of improving the power to reject  
206 models including proxy sources that are genetically distant from the true sources.

207 The rotating *qpAdm* protocol and model competition are increasingly used as central  
208 methods for testing admixture hypotheses proposed after inspecting distributions of  
209 individuals in PC spaces, similarity patterns in outcomes of *ADMIXTURE* analyses, and  $f/D$ -  
210 statistics indicative of an admixture graph rather than a simple tree relationship. Yet, the only  
211 study reporting detailed testing of *qpAdm* on simulated data (Harney et al. 2021) was  
212 performed in extremely favourable conditions: the simulated graph included just two non-  
213 nested admixture events; the sources for the principal target group diverged about 1,200

214 generations ago (almost 35,000 years ago in the case of humans); the proxy sources were  
215 strictly cladal with the actual ancestral groups for the target; several groups differentially  
216 related to these ancestry sources were available; the simulated data were free of  
217 ascertainment bias since sites were sampled in a random way; one million sites were used  
218 for most analyses; and only 50/50% simulated admixture proportions were tested for some  
219 analyses. This study confirmed that the method behaves as expected under these ideal  
220 conditions and offered some important guidelines on the choice and number of "right"  
221 populations for optimal specificity of the method and on model comparison strategies, and  
222 also showed that the results are robust to the presence of missing data, imbalanced group  
223 sizes, ancient DNA damage, and to a particular type of SNP ascertainment: selecting sites  
224 heterozygous in one individual from a certain population (Patterson et al. 2012). Among  
225 challenging historical scenarios, only multifurcation with subsequent continuing gene flow  
226 among several groups was explored, and it was concluded that *qpAdm* is not applicable in  
227 this case (Harney et al. 2021). Meanwhile, the false discovery rate (FDR) or the false positive  
228 rate (FPR) of the method and violations of the topological assumptions of *qpAdm* (Fig. 1)  
229 remained virtually unexplored. Thus, the method was proven to work and fail in polar (either  
230 extremely favourable or extremely unfavourable) conditions. But what happens in  
231 intermediate cases where arguably most of the history of humans and other mammals fits: a  
232 history that is not a nearly perfect tree, but that, on the other hand, cannot be represented  
233 solely by gene flows homogeneous in space and constant in time?

234 We are concerned that *qpAdm* performance may be compromised by the fact that the  
235 topological assumptions of the method are hard to verify in practice, especially the  
236 assumption about cladality of proxy and true ancestry sources (i.e., no gene flow to the proxy  
237 source population after its split from the true admixing source population). To explore this  
238 problem, we analyse simulated population histories in the form of complex random  
239 admixture graphs and test various types of *qpAdm* protocols common in the literature:  
240 rotating and non-rotating, with or without temporal stratification of target groups and proxy  
241 ancestry sources, with or without a model competition step. We also reproduced other  
242 aspects of a typical archaeogenetic study on simulated data: we combined various *qpAdm*  
243 protocols with PCA and an unsupervised *ADMIXTURE* analysis to explore FDR of complex  
244 admixture screening pipelines.

## 245 Results

### 246 *An overview of published rotating and model competition qpAdm protocols*

247 First, we outline two published rotating *qpAdm* protocols (Narasimhan et al. 2019, Lazaridis  
248 et al. 2022) that are typical for this class of protocols (see further examples in Skoglund et al.  
249 2017, Harney et al. 2019, Olalde et al. 2019, Calhoff et al. 2021, Fernandes et al. 2021, Librado  
250 et al. 2021, Allentoft et al. 2022, Bergström et al. 2022, Oliveira et al. 2022, Taylor et al. 2023).  
251 Lazaridis *et al.* relied on the following set of 15 reference populations: 1) Mbuti (present-day  
252 Africans); 2) a Palaeolithic group from the Caucasus (CHG, Caucasian hunter-gatherers); 3)  
253 East European Mesolithic (EHG, East European hunter-gatherers); 4) Ganj Dareh (a Neolithic  
254 group from Iran); 5) Natufians (an Epipalaeolithic group from Israel); 6) a Pre-pottery  
255 Neolithic (PPN) group from the Levant; 7) Taforalt (an Epipalaeolithic group from Morocco);  
256 8) Neolithic Mesopotamia; 9) Afontova Gora 3 (an individual from Late Upper Palaeolithic  
257 Siberia); 10) Mal'ta 1 (an individual from Late Upper Palaeolithic Siberia); 11) a Mesolithic  
258 group from the Iron Gates region (Serbia); 12) Boncuklu (a Pre-pottery Neolithic group from  
259 Central Turkey); 13) Barcin (a Neolithic group from Western Turkey); 14) Pınarbaşı (an  
260 Epipalaeolithic individual from Turkey); and 15) Mesolithic and Palaeolithic individuals from  
261 Western Europe (WHG, West European hunter-gatherers).

262 This reference set was divided into all possible "right" and proxy source subsets, except for  
263 the African group (Mbuti) which stayed in the "right" set in all models. Three Chalcolithic  
264 groups from Iran and an Early Bronze Age group from Russia (Yamnaya) were considered as  
265 proxy sources only and not rotated to the "right" set, and various clusters of Chalcolithic and  
266 Bronze Age individuals (most of them dated between ca. 5000 and 1000 years BCE) from the  
267 Balkans, Anatolia, Levant, Caucasus, Mesopotamia, and Iran were target groups for the  
268 *qpAdm* analyses. Thus, this protocol can be classified as a distal rotating protocol (Box 1) since  
269 most (but not all) targets do not pre-date the proxy sources (Fig. 2a). For each target,  
270 progressively more complex admixture models were tested, including from one to five proxy  
271 sources, and in most cases only the simplest feasible models were interpreted. Model  
272 feasibility criteria were as follows: estimated admixture proportions between 0 and 1, and  $p$ -  
273 value  $> 0.01$ . Among alternative models for the same target, those having a higher  $p$ -value  
274 were considered fitting the data better (Lazaridis et al. 2022).

275 **a, Lazaridis *et al.* 2022, distal rotating protocol**

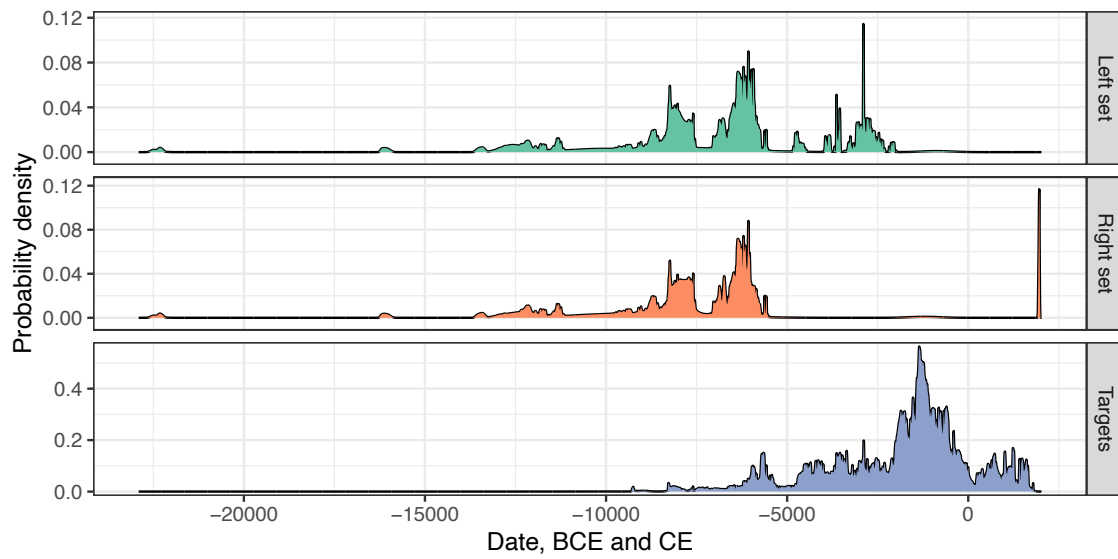

276 **b, Narasimhan *et al.* 2019, distal rotating protocol**

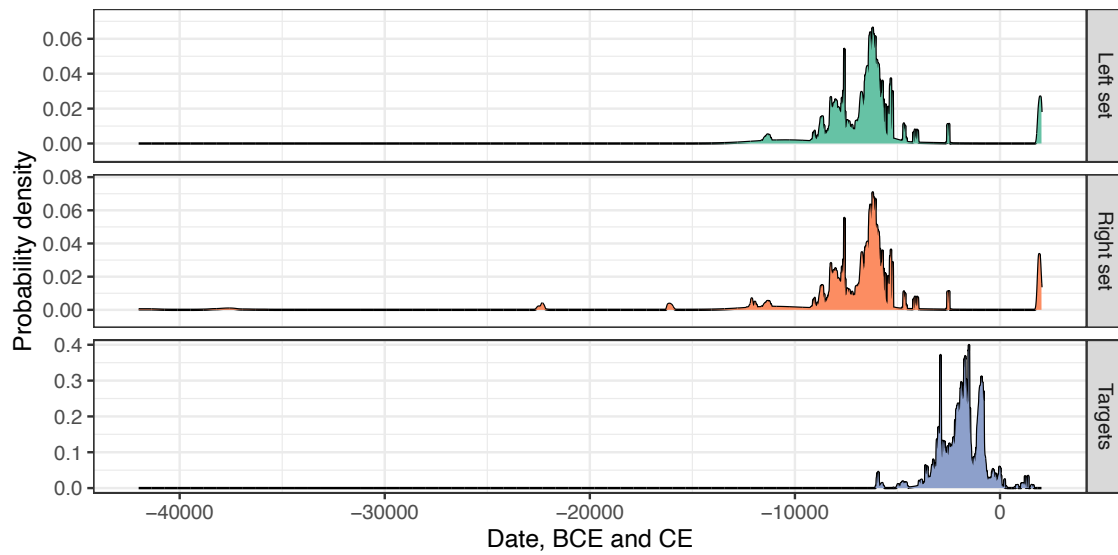

278 **c, Narasimhan *et al.* 2019, proximal model competition protocol**

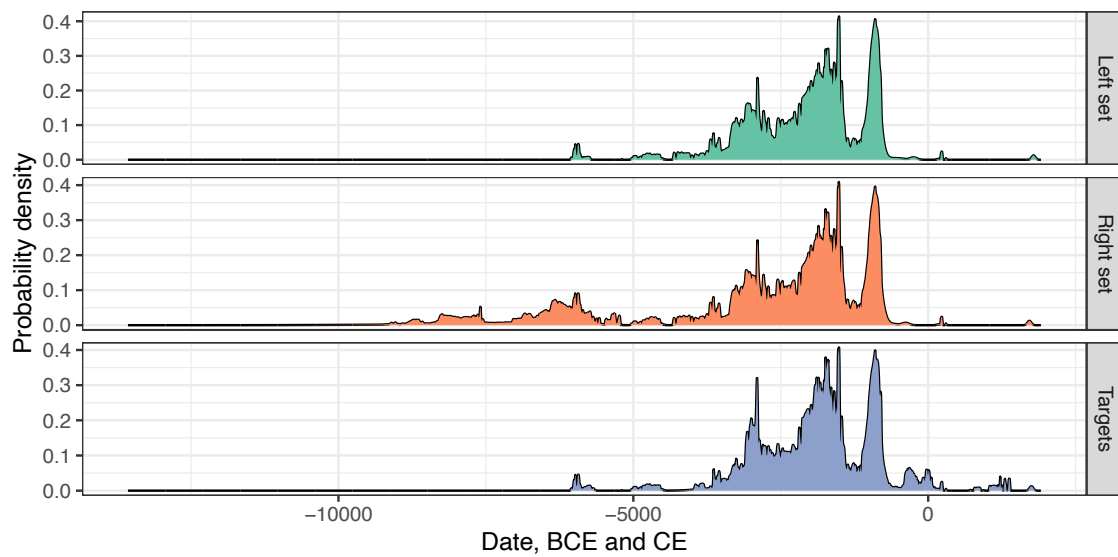

281 **Figure 2.** Distributions of radiocarbon and calendar dates for populations sets analyzed with the distal  
282 rotating *qpAdm* protocols by Lazaridis *et al.* 2022 (a) and Narasimhan *et al.* 2019 (b), and with the  
283 proximal model competition protocol from Narasimhan *et al.* 2019 (c). Probability density curves are  
284 shown for three sets of groups: 1) those appearing in the "right" set in at least one *qpAdm* model; 2)  
285 those appearing in the "left" set in at least one *qpAdm* model; 3) target groups. Targets in the former  
286 study were composed of large clusters of West Eurasian individuals, some of them dating back to the  
287 Palaeolithic (Lazaridis *et al.* 2022). For that reason, the date distribution for targets in panel a is very  
288 wide.

289

290 As shown in Fig. 2a, in this analytical setup there is a large temporal overlap between "left"  
291 groups (targets and, on average, earlier proxy sources) and "right" groups. For instance, such  
292 a divergent and ancient group as the Mal'ta 1 individual from the vicinity of Lake Baikal (dated  
293 to ca. 24,000 years before present, yBP, Raghavan *et al.* 2014) appeared "on the left" in some  
294 *qpAdm* models. Thus, "left-to-right" gene flows (that may lead to erroneous conclusions from  
295 a *qpAdm* analysis, see Fig. 1) are expected to be common in the analytical setup used by  
296 Lazaridis *et al.*

297 Narasimhan *et al.* (2019) used both proximal and distal *qpAdm* protocols (Box 1). The distal  
298 rotating protocol relied on the following set of 16 reference populations: 1) Mota (a 4500-  
299 years-old individual from Ethiopia); 2) Ust'-Ishim (an Upper Palaeolithic individual from West  
300 Siberia); 3) Tianyuan (an Upper Palaeolithic individual from Northeast China); 4) Late Upper  
301 Palaeolithic individuals from Siberia (Afontova Gora 3 and Mal'ta 1, collectively labelled  
302 "ANE" or "Ancient North Eurasians"); 5) a Late Upper Palaeolithic individual from Italy  
303 (Villabruna); 6) Natufians (an Epipalaeolithic group from Raqefet, Israel); 7) a Mesolithic  
304 individual from Iran (Belt Cave); 8) present-day Andamanese; 9) East European Mesolithic  
305 individuals (EEHG, East European hunter-gatherers); 10) West Siberian Mesolithic (WSHG,  
306 West Siberian hunter-gatherers); 11) a Pre-pottery Neolithic (PPN) group from the Levant;  
307 12) a Mesolithic group from the Iron Gates region (WEHG, West European hunter-gatherers);  
308 13) Anatolian Neolithic individuals; 14) Ganj Dareh (a Neolithic group from Iran); 15) an Early  
309 Neolithic group from the Baikal region (ESHG, East Siberian hunter-gatherers); and 16)  
310 present-day Han Chinese. This reference set was split into all possible "right" and proxy  
311 source subsets, except for the Upper Palaeolithic individuals/groups (Ust'-Ishim, Tianyuan,  
312 ANE, Villabruna) who stayed in the "right" set in all models. Diverse groups from Iran,  
313 Pakistan, Central Asia, and the Russian steppe zone (dated from the Chalcolithic to the

314 historical period) were used as targets for the *qpAdm* protocol. For each target, generally  
315 post-dating the proxy sources (Fig. 2b), progressively more complex admixture models were  
316 tested, from one- to five-way mixture models, and in most cases only the simplest feasible  
317 models were interpreted. Model feasibility criteria were as follows: estimated admixture  
318 proportions  $\pm 2$  standard errors are between 0 and 1, and  $p$ -value  $> 0.01$  (Narasimhan et al.  
319 2019).

320 In summary, this *qpAdm* protocol rotated a diverse set of groups between the "right" and  
321 "left" sets: from present-day to Mesolithic groups older than 10,000 years, and from Africans  
322 to South and East Asians (see date distributions in Fig. 2b). Another *qpAdm* protocol used by  
323 Narasimhan *et al.*, termed "proximal" protocol (Box 1), relied on a smaller fixed set of groups  
324 that were kept always "on the right": 1) Mota (a 4500-years-old individual from Ethiopia); 2)  
325 East European Mesolithic individuals (EEHG, East European hunter-gatherers); 3) West  
326 Siberian Mesolithic (WSHG, West Siberian hunter-gatherers); 4) a Pre-pottery Neolithic (PPN)  
327 group from the Levant; 5) a Mesolithic group from the Iron Gates region (WEHG, West  
328 European hunter-gatherers); 6) Anatolian Neolithic individuals; 7) Ganj Dareh (a Neolithic  
329 group from Iran); 8) an Early Neolithic group from the Baikal region (ESHG, East Siberian  
330 hunter-gatherers). Thirty-one diverse Neolithic, Chalcolithic and Bronze Age groups from  
331 Eurasia were originally used as proxy sources in one- to three-way models, but if several  
332 feasible models were found for the target, the proxy sources from those models were moved  
333 one by one from the "left" to the "right" sets (i.e., model competition was performed). The  
334 set of targets and the model feasibility criteria matched those for the "distal" protocol. At the  
335 model competition step, groups very close in space and time appeared on both sides of the  
336 "left" - "right" and proxy source - target divides (Fig. 2c), making "left-to-right" gene flows  
337 (Fig. 1) highly likely. Of 45 target groups, 23 groups were also used as rotated proxy sources.  
338 For this reason, we interpreted the Narasimhan *et al.* proximal model competition protocol  
339 as follows (Box 1): its first step is a non-rotating *qpAdm* protocol with temporal stratification  
340 of "right" and "left" sets, but with no (or very limited) temporal stratification of targets and  
341 proxy sources; and the second step is a model competition protocol with no (or very limited,  
342 see Fig. 2c) temporal stratification of targets and proxy sources. We note that any such  
343 interpretation is an approximation that captures most important features of a published  
344 protocol and omits some details.



345 Since the sets of groups that are split into the "left" and "right" subsets in the protocols  
346 summarized above are very diverse chronologically and genetically, and since there are major  
347 overlaps in dates between the "left" and "right" subsets (Fig. 2), we argue that this approach  
348 is essentially similar to taking an admixture graph connecting populations sampled at widely  
349 different times in history, with divergence dates ranging from the Palaeolithic (up to ca.  
350 87,000 yBP) to the "present" in the context of the dataset, and *randomly* splitting this graph  
351 into "left" and "right" population sets.

352

### 353 ***Testing qpAdm performance on complex simulation histories***

354 Below we explore performance on simulated data (mainly FDR) of *qpAdm* protocols  
355 representing the spectrum of protocols used in the literature. The most extreme example is  
356 a protocol where all groups are rotated and all are treated alternatively as outgroups, targets,  
357 and proxy sources, i.e., there is no temporal stratification between the latter categories. We  
358 term this protocol "proximal rotating" (see Tables S1 and S2). Although such an extreme  
359 situation is, to our knowledge, rare among published *qpAdm* protocols (see Calhoff et al.  
360 2021, Oliveira et al. 2022; in the latter study the rotating *qpAdm* strategy was used to model  
361 groups dated to 450–2600 yBP as mixtures of present-day groups), we use it to illustrate the  
362 effects of poor temporal stratification of targets and proxy sources in the case of a rotating  
363 protocol (Fig. 2). Models with targets pre-dating proxy sources are encountered in high-  
364 throughput *qpAdm* screens, but do not constitute a majority of models (Narasimhan et al.  
365 2019, Librado et al. 2021, Allentoft et al. 2022, Bergström et al. 2022, Lazaridis et al. 2022,  
366 Taylor et al. 2023). We also explore FDR of the proximal non-rotating (Harney et al. 2018, van  
367 de Loosdrecht et al. 2018, Narasimhan et al. 2019, Prendergast et al. 2019, Wang et al. 2020,  
368 Calhoff et al. 2021, Wang et al. 2021, Zhang et al. 2021, Changmai et al. 2022a, Changmai et  
369 al. 2022b, Maróti et al. 2022, Brielle et al. 2023, Lee et al. 2023), distal rotating (Narasimhan  
370 et al. 2019, Librado et al. 2021, Allentoft et al. 2022, Bergström et al. 2022, Lazaridis et al.  
371 2022, Taylor et al. 2023), and distal non-rotating protocols (Haak et al. 2015, Mathieson et al.  
372 2015, Lazaridis et al. 2016, Antonio et al. 2019, Mathieson et al. 2018, Marcus et al. 2020,  
373 Yang et al. 2020, Papac et al. 2021, Yaka et al. 2021, Patterson et al. 2022) (Tables 1 and 2).



374 In the distal protocols, only *qpAdm* models where target group's sampling date is strictly  
375 contemporaneous with or post-dates sampling of both proxy sources were considered.

376 We tested performance of these *qpAdm* protocols on complex simulated genetic histories:  
377 13 populations connected with each other by admixture graphs of random topology,  
378 including 10 pulse-like admixture events. Ten diploid individuals with no missing data were  
379 sampled from each population at "leaves" of the graph. Forty such random topologies were  
380 simulated, with an upper bound on the graph depth at 800 generations (ca. 23,000 years in  
381 the case of humans). These simulations generated sets of populations sampled at widely  
382 different dates in the past or, in other words, located at various genetic distances from the  
383 root, and matching intra-continental levels of human genetic differentiation (Fig. S1). Further  
384 details on the simulated population histories are presented in Methods and illustrated by five  
385 examples in Fig. S2. To explore the influence of data amount on *qpAdm* performance and  
386 compare it across protocols, we generated two independent sets of ten simulation replicates  
387 for each graph topology: with genomes composed of three or ten 100-Mbp-sized  
388 chromosomes (see Fig. S3 for the number of SNP loci polymorphic in the simulated datasets).  
389 These sets of simulations are referred to as "setup no. 1" and "setup no. 2" below. To explore  
390 the parameter space further, we generated single simulation replicates for two further  
391 setups: "setup no. 3", with maximal simulated history depth increased to 3,000 generations  
392 (ca. 87,000 yBP for humans), scaling all dates up proportionally; and "setup no. 4", with all  
393 terminal branches extended to the "present" of the simulation and sampled at that point.  
394 These latter simulations generated populations with median  $F_{ST}$  at the inter-continental level  
395 (no. 3) or below it (no. 4, Fig. S1).

396 A typical archaeogenetic dataset is composed of pseudo-haploid data with high proportions  
397 of missing sites and with widely different group sizes, including singleton groups. To generate  
398 more realistic "noisy" data, we also performed randomised subsampling of SNP datasets for  
399 simulation setups no. 1 and 2 (300- and 1,000-Mbp-sized genomes), for one simulation  
400 replicate per each setup (see Methods for details). The resulting data were pseudo-haploid,  
401 had missing data rates ranging from 5% to 95% across individuals, and had uneven group sizes  
402 ranging from 1 to 10 individuals. Ten independent subsampled datasets were generated for  
403 each simulated topology (400 replicates in total per simulation setup), including in the case  
404 of 300-Mbp-sized genomes from ca. 20,200 to 518,000 SNP loci with no missing data at the

405 group level and polymorphic across 13 groups (median = 89,700), and in the case of 1,000-  
 406 Mbp-sized genomes from ca. 66,600 to 2,095,700 such SNPs (median = 259,400, Fig. S3).

407 As detailed in the preceding section, various versions of *qpAdm* protocols form a core of many  
 408 recent archaeogenetic studies. These protocols are aimed at finding the simplest feasible  
 409 *qpAdm* models for target groups, where feasibility is defined by setting a threshold for  
 410 *qpAdm/qpWave* *p*-values and by setting plausibility criteria for admixture proportions  
 411 estimated with *qpAdm*. Finding a feasible two-way or more complex admixture model for a  
 412 target is often interpreted as solid evidence for gene flow, especially if the PCA and  
 413 *ADMIXTURE* methods confirm the same signal. Thus, *qpAdm* protocols are used in fact as  
 414 formal tests for admixture, whereas the latter two methods are not formal tests.

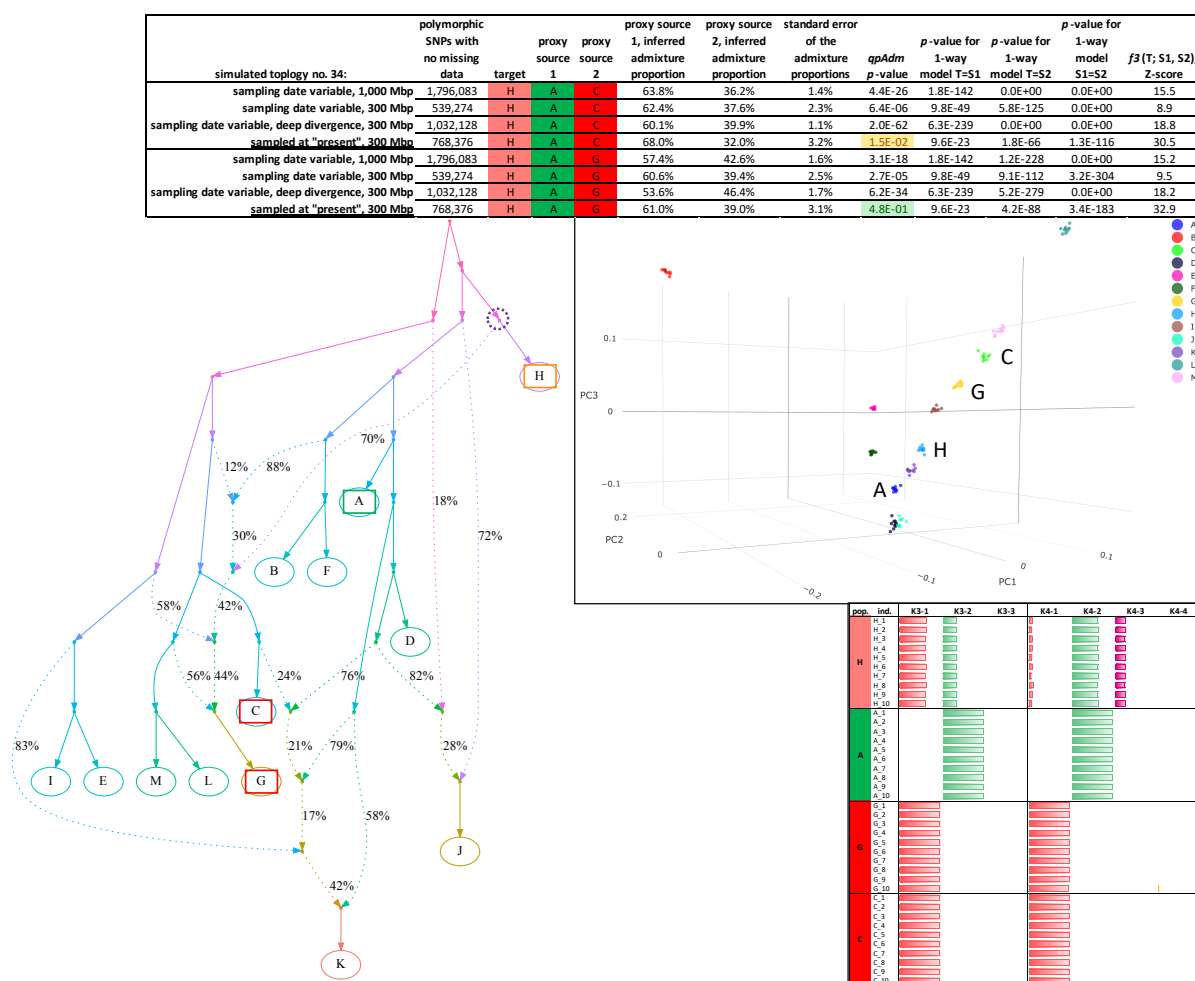

415

416 **Figure 3.** An example of the most common class of false positive *qpAdm* models supported by the  
 417 proximal rotating protocol (accounts for 50.9% of all FP models across all the simulation and  
 418 subsampling replicates in Table 2). Models of this type include at least one proxy ancestry source that  
 419 is simulated as fully cladal with the target. The other proxy source may be simulated as a descendant

420 of the target lineage (see the model " $H = A + G$ "), may belong to an unrelated lineage, or may be also  
421 cladal with the target (see the model " $H = A + C$ "). Both models shown here are also fully supported  
422 by three-dimensional PCA and by an unsupervised *ADMIXTURE* analysis at one or more  $K$  values  
423 (under the simulation setup selected). For each model, the following information is shown: 1)  
424 simulation setups; 2) the number of polymorphic sites with no missing data at the group level; 3)  
425 admixture proportions and their standard errors estimated with *qpAdm*; 4)  $p$ -value of the two-way  
426 model; 5)  $p$ -values of the corresponding one-way models; 5) Z-score of the  $f_3$ -statistic  $f_3(\text{target}; \text{proxy}$   
427  $\text{source}_1, \text{proxy source}_2)$ ; 6) simulated admixture graph illustrating topological relationships among  
428 populations that are crucial for interpreting the models as false or true, but not dates of demographic  
429 events, sampling dates, and effective population sizes; 7) projection of a three-dimensional PCA plot  
430 with key groups labelled; 8) ancestry proportions estimated with unsupervised *ADMIXTURE* for the  
431 groups constituting the *qpAdm* models (results are shown for two selected  $K$  values). Items 6 to 8 are  
432 shown for the simulation setup whose name is underlined. Target groups are highlighted in orange  
433 throughout the figure; correct proxy sources are labelled in green, and incorrect ones in red. The true  
434 ancestry source for the target is marked by a dotted circle. The same selected (underlined) simulated  
435 history with dates, effective population sizes, and pairwise  $F_{ST}$  values is presented in Fig. S2a. For each  
436 simulation setup, results are shown for simulation replicate no. 1 only.

437

438 Relying on general principles, we argue that any high-throughput *qpAdm* protocol on poorly  
439 understood complex demographic relationships is questionable as a formal test for admixture  
440 since the  $p$ -value threshold allows to *reject*, but not to *accept* models, and it is safer to  
441 interpret those models as a certain number of gene flows connecting "left" and "right" sets  
442 in any direction, not in the form of proxy sources and admixture proportions for a target. The  
443 model feasibility criterion including both  $p$ -values and admixture proportions estimated with  
444 *qpAdm* is a complex construct relying on the topological assumptions outlined in Fig. 1. We  
445 expect that taking "left" and "right" sets that are not well-separated in time or  
446 contemporaneous (Fig. 2), and where relationships among groups are poorly understood  
447 (which is almost always true for exploratory studies), enriches the system for "left-to-right"  
448 gene flows, which in turn leads to frequent rejection of true simple admixture models. Since  
449 the behaviour of *qpAdm* admixture proportion estimates under different demographic  
450 scenarios is poorly understood, it is possible that a large fraction of these non-rejected  
451 complex models emerges as feasible, resulting in false signals of admixture.

452 The *qpAdm* protocols we applied to the simulated data were focused on the simplest models:  
453 one- and two-way admixture models (we note that histories that are more complex than two-  
454 way mixtures were common in the data, Fig. S2). The model feasibility criterion followed  
455 Narasimhan *et al.* (2019), see Box 1 for a definition. Thus, we tested all possible two-way

456 admixture models for 40 complex population histories (34,320 models per simulation setup  
457 and replicate).

458 The non-rotating *qpAdm* approach was implemented as follows: for each simulated graph six  
459 most ancient groups were selected as a fixed “right” set (ties were resolved in alphabetical  
460 order; these “right” sets remained unchanged for a given graph topology across independent  
461 simulations) and for the remaining seven groups all possible one-way and two-way admixture  
462 models were tested, applying the same composite feasibility criterion that was used for the  
463 rotating protocol.

464 In the context of complex and random admixture graph topologies it is hard to draw a strict  
465 boundary between true and false admixture models composed of a target and only two proxy  
466 sources. However, we classified the feasible *qpAdm* models into false and true ones relying  
467 on a set of rules. By far the most common class of false feasible *qpAdm* models (referred to  
468 as “false positive” or FP models), comprising 50.9% of all FP models generated by the  
469 proximal rotating protocol across all the simulation and subsampling replicates (setups no. 1  
470 and 2), occurs when the target group is rejected as forming a clade with one or both proxy  
471 sources whilst they are simulated on graph topologies as clades. Interestingly, false cladality  
472 rejection accounted only for 10.1% of FP models generated by the proximal non-rotating  
473 protocol across all the simulation and subsampling replicates.

474 An example of this situation is shown in Fig. 3 where the clade relationship between the  
475 target (*H*) and source (*A*) is rejected due “left-to-right” gene flows violating the topological  
476 assumptions of *qpAdm*, and more complex models (“ $H = A + C$ ” and “ $H = A + G$ ”) are evaluated  
477 as true. When a true one-way model “ $H = A$ ” is tested, *A* represents a proxy for the only true  
478 source of ancestry in *H*, and outgroups *B*, *D*, and *F* split off the proxy branch after its  
479 divergence from the true source (this situation is shown in Fig. 1e), and ancestry in outgroups  
480 *J* and *K* is largely derived from that branch too (Fig. 1c), resulting in rejection of the one-way  
481 model with a very low *p*-value,  $\sim 10^{-23}$  (Fig. 3). Removal of all these outgroups (*B*, *D*, *F*, *J*, *K*)  
482 increases the *p*-value of the “ $H = A$ ” model by many orders of magnitude, to 0.4. Models “ $H$   
483 = *B/C/D/F*” are also rejected with *p*-values below  $\sim 10^{-34}$ . Interestingly, not only the one-way  
484 models, but all two-way models “ $H = A/B/C/D/F + X$ ” were rejected according to *p*-values  
485 under at least three of four simulation setups (Fig. 3; removal of certain outgroups was not

486 done). The FP models shown in Fig. 3 under simulation setup no. 4 cannot be filtered out by  
487 temporal stratification of targets and sources since all groups were sampled at “present”.

488 Other topological classes of FP models can be concisely described as follows (and are more  
489 precisely defined in Methods): 1) a proxy source included in the model is symmetrically  
490 related to all real sources of ancestry in the target (see an example of such feasible *qpAdm*  
491 models in Fig. S4a), or both proxy sources represent the same true source and are  
492 symmetrically related to all the other true sources (Fig. S4b); 2) both proxy sources represent  
493 distinct real sources, however a proxy source is a heavily admixed group sharing less than  
494 40% of ancestry with the real source (Fig. S4c); 3) gene flow goes from the target lineage  
495 (after the last admixture event in its history) to the proxy source lineage, not in the opposite  
496 direction (Fig. S4d). Two-way admixture models for targets with population history best  
497 approximated with three-way and more complex models were considered as true positives if  
498 they included source proxies *not* satisfying the false positivity criteria listed above for at least  
499 two true sources. We also note that the class of models classified as true positive (TP) was  
500 not restricted to those including most optimal source proxies, if the models do *not* satisfy the  
501 false positivity criteria. On a random sample of 400 two-way admixture models from our 40  
502 simulated histories, the fraction of models that were classified as appropriate (true)  
503 according to the rules described above was 17.7%. Since groups that are truly admixed are  
504 common in our simulations, we do not expect to encounter a “needle in a haystack” situation  
505 where finding true admixture models is exceedingly hard.

506 Violations of the topological assumptions of *qpAdm* encountered in the examples of FP model  
507 classes are described below. All the models shown below were selected among feasible  
508 models that were outcomes of the proximal rotating protocol, and, for simplicity, *qpAdm*,  
509 PCA, and *ADMIXTURE* results are presented for one simulation replicate per simulation setup.  
510 In Fig. S4a, the target group, *A*, was simulated as a two-way mixture, and we expect that  
511 models “ $A = B + C/K$ ” would be fitting. The topological assumptions are violated when testing  
512 these models (Fig. S4a): groups *C* and *K* are cladal, with one of them appearing in the “left”  
513 set and the other one in the “right” set (see Fig. 1e); a gene flow from an outgroup branch,  
514 *D*, enters the *C/K* branch after it splits from one of the true ancestry sources (Fig. 1a).  
515 However, *p*-values of the models “ $A = B + C/K$ ” are high (0.93, 0.97), and they were rejected  
516 due to estimated admixture proportions being negative. Removal of the outgroups *C*, *D*, and

517  $K$  does not make these models fitting. In contrast, incorrect models “ $A = B + G/J$ ” emerged as  
518 fitting (Fig. S4a), where the proxy sources  $G$  and  $J$  are symmetrically related to both true  
519 ancestry sources in the target.

520 In Fig. S4b, the target group,  $A$ , was simulated as a two-way mixture, and both correct ( $A = F$   
521  $+ B$ ) and incorrect ( $A = F + M$ ) models are fitting, suggesting that violations of the topological  
522 assumptions play no role in the emergence of this false positive model. Failure to reject the  
523 model “ $A = F + M$ ”, where both proxy sources represent only one true ancestry source and  
524 are symmetrically related to the other, may be attributed to the lack of data, however  
525 increasing the simulated genome size from 300 Mbp to 1,000 Mbp or increasing the  
526 simulated graph depth from 800 to 3,000 generations resulted in rejections of both the  
527 correct and incorrect models with  $p$ -values below  $\sim 10^{-5}$  (Fig. S4b).

528 In Fig. S4c, the target group,  $E$ , was simulated as a two-way mixture, but no appropriate  
529 source proxy was simulated for one of the true ancestry sources: in groups  $H$  and  $A$ , 30% and  
530 6% of their ancestry, respectively, is derived from that true source. Thus, multiple gene flows  
531 from the “right” set enter the  $A$  lineage after its split from the true ancestry source, and the  
532 same is true for the  $H$  lineage, and these are violations of the topological assumptions (Fig.  
533 1a). The model “ $E = H + L$ ” was rejected according to  $p$ -values under all four simulation setups,  
534 and the model “ $E = A + L$ ” was rejected according to  $p$ -values when more data was available  
535 (the simulated genome size increased from 300 Mbp to 1,000 Mbp, or the simulated graph  
536 depth increased from 800 to 3,000 generations, see Fig. S4c). Accepting models like “ $E = A +$   
537  $L$ ” at face value may lead to erroneous historical interpretations, but all thresholds for  
538 classifying models of this type into false and true are arbitrary. We chose 40% as a threshold  
539 percentage of proxy source’s ancestry derived from the corresponding true source.

540 In Fig. S4d, the target group,  $G$ , was simulated as a two-way mixture, and an incorrect model  
541 “ $G = C + J$ ” emerged as fitting. Here,  $J$  is a descendant of  $G$  (87% of its ancestry) rather than a  
542 proxy source (only  $\sim 2\%$  of its ancestry is derived from one of the true ancestry sources). The  
543 model “ $G = C + J$ ” was rejected according to  $p$ -values when more data was available (the  
544 simulated genome size increased from 300 Mbp to 1,000 Mbp, or the simulated graph depth  
545 increased from 800 to 3,000 generations, see Fig. S4d). Correct models such as “ $G = A + J$ ”  
546 were rejected according to  $p$ -values (Fig. S4d) due to violations of the topological

547 assumptions: for instance, outgroups *C* and *I* are derived from the target lineage after the  
548 admixture event (Fig. 1d). However, removal of various violating outgroups did not make the  
549 model " $G = A + J$ " and similar models " $G = L/M + J$ " fitting.

550 While FP *qpAdm* models are expected for complex genetic histories, the practical usage of  
551 the *qpAdm* relies on an assumption that false positives are rare. However, FDR of the four  
552 *qpAdm* protocols tested here (rotating and non-rotating, proximal and distal) varied between  
553 12.1% and 68.1% (across all simulation setups and replicates summarized in Table 1). Key  
554 statistics in our study are false discovery rate (FDR) and false omission rate (FOR); see Box 1  
555 for definitions. We estimated FDR and FOR instead of false positive and false negative rates  
556 of the *qpAdm* protocols and other methods due to a technical limitation: the process of model  
557 classification into true and false ones cannot be fully automated since it requires careful  
558 interpretation of the topology and simulated admixture proportions. Therefore, classifying  
559 all possible 34,320 two-way admixture models (858 per simulated topology) into true and  
560 false was hardly feasible. We estimated false positive (FPR) and true positive rates (TPR) only  
561 approximately, relying on the fractions of negatives and positives in random samples of two-  
562 way admixture models (see below). FPR in our context is the probability that a two-way model  
563 with an unadmixed target and/or inappropriate proxy source(s) emerges as fitting in a single  
564 *qpAdm* test. TPR in our context is the probability that a two-way model with an admixed  
565 target and both proxy sources being appropriate emerges as fitting in a *qpAdm* test.

566

### 567 ***Influence of the amount of data and temporal stratification on the performance of qpAdm*** 568 ***protocols***

569 The amount of data (3.3-fold difference in simulated genome sizes) had no influence on FDR  
570 of *qpAdm* protocols in the case of randomly subsampled pseudo-haploid data (no statistically  
571 significant difference was found between sets of 10 subsampling replicates in the case of four  
572 *qpAdm* protocols, Table 2, Fig. 4). In contrast, small but statistically significant influence of  
573 the data amount on FDR (according to the two-sided Wilcoxon test) was observed for three  
574 of four *qpAdm* protocols applied to high-quality data: proximal rotating and non-rotating, and  
575 distal non-rotating (Table 2, Fig. 4).



| simulation scheme            | max. depth of the simulation, gen. | pseudohaploid noisy data | genome size, Mbp | model class  | protocol     | number of two-way models in the respective class (min.-max.) |                                |                                  |                                |                       |                                | number of two-way models in the respective class |                                  |                       |                                     | number of two-way models in the respective class |                       |        |       |       |  |
|------------------------------|------------------------------------|--------------------------|------------------|--------------|--------------|--------------------------------------------------------------|--------------------------------|----------------------------------|--------------------------------|-----------------------|--------------------------------|--------------------------------------------------|----------------------------------|-----------------------|-------------------------------------|--------------------------------------------------|-----------------------|--------|-------|-------|--|
|                              |                                    |                          |                  |              |              | fraction of models that are distal                           | min.-max. across 10 replicates | FDR for proximal & distal models | min.-max. across 10 replicates | FDR for distal models | min.-max. across 10 replicates | supported by 3D PCA                              | FDR for proximal & distal models | FDR for distal models | supported by unsupervised ADMIXTURE | FDR for proximal & distal models                 | FDR for distal models |        |       |       |  |
| date variable, no. 1 (noisy) | 800                                | yes                      | 300              | FP           | non-rotating | 75 (62-95)                                                   | 37.3%                          | 30.6%-42.9%                      | 37.4%                          | 29.5%-42.3%           | 24.2%                          | 17.6%-28.1%                                      |                                  |                       |                                     |                                                  |                       |        |       |       |  |
|                              |                                    |                          |                  |              | rotating     | 642 (579-733)                                                | 20.9%                          | 17.8%-24.6%                      | 53.0%                          | 51.6%-54.9%           | 25.1%                          | 22.4%-29.0%                                      |                                  |                       |                                     |                                                  |                       |        |       |       |  |
|                              |                                    |                          |                  | TP           | non-rotating | 146 (115-149)                                                | 67.0%                          | 60.0%-76.4%                      |                                |                       |                                |                                                  |                                  |                       |                                     |                                                  |                       |        |       |       |  |
|                              |                                    |                          |                  |              | rotating     | 554 (492-613)                                                | 68.6%                          | 66.7%-73.8%                      |                                |                       |                                |                                                  |                                  |                       |                                     |                                                  |                       |        |       |       |  |
| date variable, no. 2 (noisy) | 800                                | yes                      | 1000             | FP           | non-rotating | 86 (76-102)                                                  | 36.2%                          | 28.2%-47.3%                      | 39.3%                          | 34.1%-41.2%           | 25.1%                          | 18.6%-32.6%                                      |                                  |                       |                                     |                                                  |                       |        |       |       |  |
|                              |                                    |                          |                  |              | rotating     | 417 (355-500)                                                | 19.4%                          | 17.7%-23.5%                      | 54.6%                          | 51.7%-59.7%           | 24.0%                          | 21.8%-27.9%                                      |                                  |                       |                                     |                                                  |                       |        |       |       |  |
|                              |                                    |                          |                  | TP           | non-rotating | 133 (126-164)                                                | 66.8%                          | 62.7%-72.5%                      |                                |                       |                                |                                                  |                                  |                       |                                     |                                                  |                       |        |       |       |  |
|                              |                                    |                          |                  |              | rotating     | 340 (297-405)                                                | 74.0%                          | 70.1%-81.3%                      |                                |                       |                                |                                                  |                                  |                       |                                     |                                                  |                       |        |       |       |  |
| date variable, no. 1         | 800                                | no                       | 300              | FP           | non-rotating | 76 (62-92)                                                   | 39.2%                          | 34.5%-48.0%                      | 42.6%                          | 35.8%-45.5%           | 31.2%                          | 24.5%-34.4%                                      | 20                               | 30.0%                 | 35.1%                               | 18.2%                                            | 2                     | 100.0% | 4.5%  | 6.1%  |  |
|                              |                                    |                          |                  |              | rotating     | 247 (194-268)                                                | 16.4%                          | 10.5%-19.1%                      | 57.4%                          | 55.6%-62.6%           | 22.1%                          | 14.4%-27.9%                                      | 129                              | 7.8%                  | 61.4%                               | 14.3%                                            | 59                    | 3.4%   | 49.6% | 4.4%  |  |
|                              |                                    |                          |                  | TP           | non-rotating | 105 (93-115)                                                 | 65.5%                          | 59.5%-71.2%                      |                                |                       |                                |                                                  | 37                               | 73.0%                 |                                     |                                                  | 42                    | 73.8%  |       |       |  |
|                              |                                    |                          |                  |              | rotating     | 165 (149-202)                                                | 80.8%                          | 78.1%-84.1%                      |                                |                       |                                |                                                  | 72                               | 59.7%                 |                                     |                                                  | 67                    | 58.2%  |       |       |  |
|                              | 800                                | no                       | 1000             | FP           | non-rotating | 43 (32-62)                                                   | 40.4%                          | 26.8%-53.1%                      | 38.4%                          | 31.3%-41.5%           | 26.5%                          | 16.4%-30.4%                                      | 14                               | 35.7%                 | 40.0%                               | 23.8%                                            | 1                     | 0.0%   | 3.2%  | 0.0%  |  |
|                              |                                    |                          |                  |              | rotating     | 127 (106-139)                                                | 10.5%                          | 6.0%-16.7%                       | 62.0%                          | 57.6%-68.1%           | 16.4%                          | 12.1%-26.7%                                      | 18                               | 68.7%                 | 70.6%                               | 10.3%                                            | 18                    | 0.0%   | 40.9% | 0.0%  |  |
|                              |                                    |                          |                  | TP           | non-rotating | 75 (65-95)                                                   | 66.0%                          | 58.9%-74.7%                      |                                |                       |                                |                                                  | 84                               | 3.6%                  |                                     |                                                  | 30                    | 80.0%  |       |       |  |
|                              |                                    |                          |                  |              | rotating     | 75 (65-84)                                                   | 83.6%                          | 80.0%-88.1%                      |                                |                       |                                |                                                  | 30                               | 26.7%                 |                                     |                                                  | 96                    | 11.5%  |       |       |  |
| 3000                         | no                                 | 300                      | FP               | non-rotating | 36           | 38.9%                                                        | 36.0%                          |                                  | 24.1%                          |                       |                                | 12                                               | 33.3%                            | 34.3%                 | 20.0%                               | 5                                                | 20.0%                 | 12.8%  | 5.3%  |       |  |
|                              |                                    |                          |                  | rotating     | 61           | 16.4%                                                        | 66.3%                          |                                  | 25.6%                          |                       |                                | 24                                               | 41.7%                            |                       |                                     | 31                                               | 41.9%                 |        |       |       |  |
|                              |                                    |                          | TP               | non-rotating | 64           | 68.8%                                                        |                                |                                  |                                |                       |                                | 41                                               | 7.3%                             | 77.4%                 | 23.1%                               | 12                                               | 8.3%                  | 46.2%  | 7.7%  |       |  |
|                              |                                    |                          |                  | rotating     | 31           | 93.5%                                                        |                                |                                  |                                |                       |                                | 20                                               | 35.0%                            |                       |                                     | 49                                               | 18.4%                 |        |       |       |  |
| at "present", no. 4          | 800                                | no                       | 300              | FP           | non-rotating | 99                                                           | 40.4%                          | 42.1%                            |                                | 30.3%                 |                                |                                                  | 53                               | 64.2%                 | 36.1%                               | 34.0%                                            | 18                    | 72.2%  | 20.5% | 19.1% |  |
|                              |                                    |                          |                  |              | rotating     | 364                                                          | 17.6%                          | 64.0%                            |                                | 29.8%                 |                                |                                                  | 46                               | 13.0%                 |                                     |                                                  | 81                    | 33.3%  |       |       |  |
|                              |                                    |                          |                  | TP           | non-rotating | 136                                                          | 67.6%                          |                                  |                                |                       |                                |                                                  | 178                              | 22.5%                 | 59.5%                               | 29.9%                                            | 59                    | 22.0%  | 37.8% | 15.1% |  |
|                              |                                    |                          |                  |              | rotating     | 205                                                          | 73.7%                          |                                  |                                |                       |                                |                                                  | 186                              | 12.9%                 |                                     |                                                  | 305                   | 16.7%  |       |       |  |
|                              | 800                                | no                       | 300              | FP           | non-rotating | 99                                                           | 40.4%                          | 42.1%                            |                                | 30.3%                 |                                |                                                  | 94                               | 70.2%                 |                                     |                                                  | 70                    | 78.6%  |       |       |  |
|                              |                                    |                          |                  |              | rotating     | 364                                                          | 17.6%                          | 64.0%                            |                                | 29.8%                 |                                |                                                  | 42                               | 68.9%                 |                                     |                                                  | 66                    | 56.1%  |       |       |  |
|                              |                                    |                          |                  | TP           | non-rotating | 136                                                          | 67.6%                          |                                  |                                |                       |                                |                                                  | 121                              | 77.7%                 |                                     |                                                  | 97                    | 75.8%  |       |       |  |
|                              |                                    |                          |                  |              | rotating     | 205                                                          | 73.7%                          |                                  |                                |                       |                                |                                                  | 84                               | 67.9%                 |                                     |                                                  | 108                   | 72.2%  |       |       |  |

576

577 **Table 1.** Assessing the effect of temporal stratification of targets and proxy sources on FDR of non-  
578 rotating and rotating *qpAdm* protocols and their combinations with PCA and *ADMIXTURE* analyses.  
579 Another kind of temporal stratification, stratification of the “right” and “left” sets, was a part of the  
580 non-rotating protocols, but not of the rotating ones. FDR values are highlighted in the respective  
581 columns and color-coded. In the right half of the table these FP and TP classes are further subdivided  
582 into those supported/not supported (highlighted in green and red, respectively) by another method  
583 (PCA or *ADMIXTURE*). For each model class and sub-class, fractions of models in the FP and TP classes  
584 that are distal are shown with magenta bars. If all groups were sampled at present (simulation setup  
585 no. 4), selection of time-stratified admixture models was performed as if they were sampled in the  
586 past (as in simulation setups no. 1-3) since simulated topologies were the same across all the setups  
587 and differed only in the amount of genetic drift on graph edges. In the case of simulation setups no.  
588 1 and 2, 10 simulation replicates and 10 subsampling replicates derived from simulation replicate no.  
589 1 were generated, and median, minimal, and maximal values across the replicates are shown for  
590 counts of FP and TP *qpAdm* models, for fractions of models that are distal, and for FDR.

591



592 In the case of the most extreme *qpAdm* protocol, proximal rotating, adding data increased  
 593 median FDR from 57.4% to 62%, and this difference is statistically significant (Table 2). A large  
 594 fraction of false positives in the case of the proximal rotating protocol emerges due to false  
 595 rejections of one-way models because of violations of the topological assumptions (Fig. 1),  
 596 for instance, due to “left-to-right” gene flows, and that prompts the investigator to test more  
 597 complex two-way models, which often emerge as feasible. And model rejection is more  
 598 efficient when more data are available, explaining the effect on FDR observed here. As we  
 599 show in Suppl. text 1, it is probably impossible to decrease FDR of the proximal rotating  
 600 protocol dramatically by combining it with other methods (PCA and unsupervised  
 601 *ADMIXTURE*) as additional controls or by adjusting *p*-value thresholds in the *qpAdm* protocol.

| two-sided Wilcoxon test, <i>p</i> -value (paired test if <i>qpAdm</i> protocols differ, but simulation parameters are the same) |          |                       |              |                 |                     |                        |              |                 |                     |       |
|---------------------------------------------------------------------------------------------------------------------------------|----------|-----------------------|--------------|-----------------|---------------------|------------------------|--------------|-----------------|---------------------|-------|
| max. depth of the simulation: 800 gen.                                                                                          |          | proximal              |              |                 |                     | proximal               |              |                 |                     |       |
|                                                                                                                                 |          | proximal non-rotating | non-rotating | distal rotating | distal non-rotating | proximal non-rotating  | non-rotating | distal rotating | distal non-rotating |       |
| date variable sampling                                                                                                          |          | 300-Mbp-sized genomes |              |                 |                     | 1000-Mbp-sized genomes |              |                 |                     |       |
| <b>subsampling replicates on pseudohaploid data</b>                                                                             |          |                       |              |                 |                     |                        |              |                 |                     |       |
| proximal rotating<br>proximal non-rotating<br>distal rotating<br>distal non-rotating                                            | 300 Mbp  | 53.0%                 | 0.002        | 0.002           | 0.002               | 0.166                  |              |                 |                     |       |
|                                                                                                                                 |          |                       | 37.4%        | 0.002           | 0.002               |                        | 0.190        |                 |                     |       |
|                                                                                                                                 |          |                       |              | 25.1%           | 0.160               |                        |              | 0.579           |                     |       |
|                                                                                                                                 |          |                       |              |                 | 24.2%               |                        |              |                 |                     | 0.186 |
| proximal rotating<br>proximal non-rotating<br>distal rotating<br>distal non-rotating                                            | 1000 Mbp | 54.6%                 | 0.002        | 0.002           | 0.002               |                        |              |                 |                     |       |
|                                                                                                                                 |          |                       | 39.3%        | 0.002           | 0.002               |                        |              |                 |                     |       |
|                                                                                                                                 |          |                       |              | 24.0%           | 0.625               |                        |              |                 |                     |       |
|                                                                                                                                 |          |                       |              |                 | 25.1%               |                        |              |                 |                     |       |
| <b>simulation replicates on high-quality data</b>                                                                               |          |                       |              |                 |                     |                        |              |                 |                     |       |
| proximal rotating<br>proximal non-rotating<br>distal rotating<br>distal non-rotating                                            | 300 Mbp  | 57.4%                 | 0.002        | 0.002           | 0.002               | 0.009                  |              |                 |                     |       |
|                                                                                                                                 |          |                       | 42.6%        | 0.002           | 0.002               |                        | 0.009        |                 |                     |       |
|                                                                                                                                 |          |                       |              | 22.1%           | 0.010               |                        |              | 0.143           |                     |       |
|                                                                                                                                 |          |                       |              |                 | 31.2%               |                        |              |                 | 0.003               |       |
| proximal rotating<br>proximal non-rotating<br>distal rotating<br>distal non-rotating                                            | 1000 Mbp | 62.0%                 | 0.002        | 0.002           | 0.002               |                        |              |                 |                     |       |
|                                                                                                                                 |          |                       | 38.4%        | 0.002           | 0.002               |                        |              |                 |                     |       |
|                                                                                                                                 |          |                       |              | 16.4%           | 0.002               |                        |              |                 |                     |       |
|                                                                                                                                 |          |                       |              |                 | 26.5%               |                        |              |                 |                     |       |

602  
 603 **Table 2.** Comparing FDR of four *qpAdm* protocols, proximal and distal, rotating and non-rotating, on  
 604 10 subsampling replicates derived from a single simulation replicate (low-quality data) or on 10  
 605 simulation replicates and high-quality genomes (300-Mbp-sized or 1000-Mbp-sized genomes). For  
 606 details on generating replicates of low-quality data see Methods. Median FDR values for *qpAdm*  
 607 protocols are shown on the diagonal. The protocols were compared using the two-sided Wilcoxon  
 608 test applied to FDR values, see the cells above the diagonal.

609  
 610 However, in the case of both proximal and distal non-rotating protocols, adding data led to a  
 611 small but statistically significant decrease in FDR: 42.6% vs. 38.4%, 31.2% vs. 26.5% (Table 2,

612 Fig. 4), suggesting that false model rejections due to assumption violations play a less  
 613 important role here, which is expected for “right” and “left” population sets which are  
 614 stratified temporally. We found no significant effect of the data amount on FDR in the case  
 615 of the distal rotating protocol, which demonstrated the best median FDR values on high-  
 616 quality data overall (22.1 and 16.4%, Table 2, Fig. 4). We did not compare FDR between high-  
 617 quality and low-quality datasets with the Wilcoxon test since replicates in these cases were  
 618 generated differently (in the latter case subsampling replicates were derived from one  
 619 simulation replicate per simulation setup, while in the former case ten simulation replicates  
 620 were considered per simulation setup), but we note that random subsampling of SNPs and  
 621 individuals and a less robust algorithm for calculating  $f_4$ -statistics (with different statistics  
 622 calculated on different SNP sets) did not lead to dramatic increases/decreases in FDR (Table  
 623 2, Fig. 4).

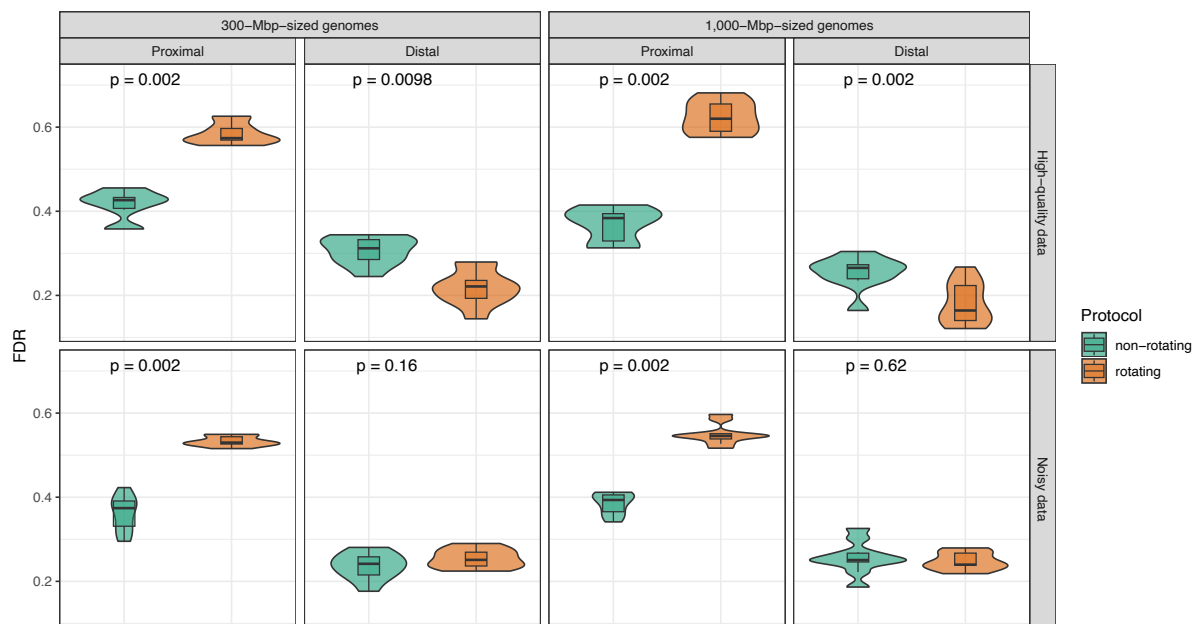

624

625 **Figure 4.** Distributions of FDR values across 10 simulation replicates (for high-quality data) or across  
 626 10 subsampling replicates derived from a single simulation replicate (for low-quality data).  
 627 Distributions are summarized with boxplots and violin plots for four *qpAdm* protocols (proximal and  
 628 distal, rotating and non-rotating) and two simulated genome sizes (300 Mbp and 1,000 Mbp). *qpAdm*  
 629 protocols were compared with the paired two-sided Wilcoxon test, and *p*-values for “rotating vs. non-  
 630 rotating” comparisons are shown in the panels (for the other *p*-values see Table 2).

631

632 Next, we move on to assessing the influence of *qpAdm* protocol details on FDR. Temporal  
633 stratification of targets and proxy sources (the former are not allowed to pre-date the latter)  
634 is the best way of reducing FDR, according to our analysis: from ~50%–60% to ~15%–25% for  
635 rotating protocols, and from ~40% to ~25%–30% for non-rotating protocols (Table 2, Fig. 4).  
636 All these differences are statistically significant according to the two-sided Wilcoxon test (the  
637 paired version of the test was used in this case since different *qpAdm* protocols applied to  
638 the same simulation/subsampling replicate are not totally independent experiments).  
639 Temporal stratification of “right” and “left” sets (i.e., the non-rotating protocol) is helpful in  
640 the absence of the former type of temporal stratification, of targets and proxy sources: FDR  
641 drops from ~50%–60% to ~40% (these differences are also statistically significant, Table 2,  
642 Fig. 4). However, it is not helpful (no significant difference) or even damaging to *qpAdm*  
643 performance (significantly worse) when applied to distal protocols (Table 2, Fig. 4). This result  
644 supports the conclusion by Harney et al. (2021) that rotating *qpAdm* protocols should be  
645 preferred to non-rotating ones. However, according to our analysis, this conclusion is  
646 conditional on strictly enforced temporal stratification of targets and proxy sources since the  
647 rotating protocol without such stratification (“proximal rotating”) demonstrated by far the  
648 worst performance.

649 Another observation is that absolute FDR values are high for all *qpAdm* protocols tested  
650 (median FDR values below 16.4% were not observed), however these absolute values are  
651 expected to depend on the complexity of simulated histories and on the amount of data  
652 (Table 2), which also depends on the time depth of simulated histories (Fig. S3, see  
653 Discussion).

654 The fraction of two-way admixture models that are inappropriate according to our  
655 topological criteria (the fraction of negatives) in a random sample of 400 models from all  
656 simulated graphs is 82.3%, which allows us to approximately estimate not only FDR (51.6%–  
657 68.1%, see Table 1), but the FPR of the proximal rotating protocol = number of false positives  
658 per simulation replicate / number of negatives per simulation replicate [858 models × 40  
659 graphs × fraction of negatives] = 0.4%–2.6% across simulation parameter combinations and  
660 replicates summarized in Table 2. The TPR of the proximal rotating protocol = number of true  
661 positives per simulation replicate / number of positives per simulation replicate [858 models

662  $\times 40$  graphs  $\times (1 - \text{fraction of negatives})] = 1.1\%–10.1\%$ . Here are the same statistics for the  
663 distal non-rotating protocol: the fraction of negatives in a random sample of 400 distal non-  
664 rotating models from all simulated graphs, 74.3%; total number of distal non-rotating two-  
665 way models across all graphs, 1804; FDR across simulation parameter combinations and  
666 replicates from Table 2, 16.4%–34.4%; FPR, 0.8%–3.2%; TPR, 9.7%–24.4%. Thus, although FPR  
667 of a single *qpAdm* test is low, due to the relatively high proportion of negatives among all  
668 models, the large number of models tested in high-throughput *qpAdm* screens, and the low  
669 TPR, FDR becomes high, compromising historical interpretation of such screens for  
670 admixture.

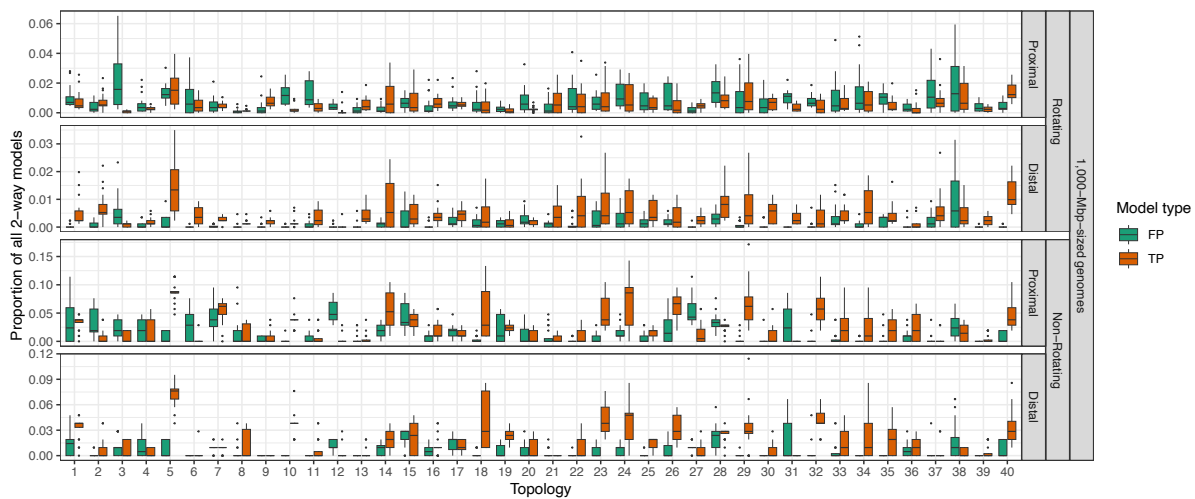

671

672 **Figure 5.** Proportions of all possible two-way *qpAdm* models that are false positive (FP), or true  
673 positive (TP), binned by simulated graph topology. There are 858 two-way admixture models per  
674 simulated graph including 13 groups if the rotating *qpAdm* protocol is applied, and 105 models if the  
675 non-rotating protocol is applied. For brevity, results are shown for simulation setup no. 2 (high-quality  
676 data) only. The boxplots summarize distributions of FP and TP model fractions across simulation  
677 replicates.

678

679 The fraction of feasible *qpAdm* models that are false (FP) varies a lot depending on simulated  
680 graph topology (Fig. 5), and hence it is hard to predict if a particular real genetic history is  
681 prone to generating FP signals of admixture when *qpAdm* protocols are applied. Among 80  
682 combinations of proximal *qpAdm* protocols (rotating or non-rotating), simulation setups, and  
683 simulation/subsampling replicates we tested, in one case only a topology accounts for >20%  
684 of FP *qpAdm* models found across all the 40 simulated topologies. In contrast, in the case of  
685 distal *qpAdm* protocols, results are much more uneven across topologies: for 25 of 80

686 “protocol/simulation setup/replicate” combinations, at least one topology accounts for >20%  
687 of FP *qpAdm* models found across all the 40 simulated topologies. Three topologies most  
688 problematic for distal *qpAdm* protocols are illustrated in Fig. S5:

689

### 690 ***Admixture inference pipelines and model competition qpAdm protocols***

691 An implicit assumption of many archaeogenetic studies relying on *qpAdm* protocols is that  
692 admixture models supported by clines observed in (usually two-dimensional) spaces of  
693 principal components, and/or by an *ADMIXTURE* analysis, and/or by individual  $D$ -,  $f_4$ - or  $f_3$ -  
694 statistics are especially robust. And, *vice versa*, *qpAdm* results are often interpreted as a  
695 formal test of hypotheses about admixture formulated based on PCA and/or *ADMIXTURE*  
696 results. We constructed “admixture inference pipelines” composed of a *qpAdm* protocol and  
697 one or two further methods to test these assumptions on simulated data. We note that all  
698 signals of admixture revealed by our PCA or *ADMIXTURE* analyses were not explored with  
699 *qpAdm* since exhaustive lists of positive and negative two-way admixture models were not  
700 compiled for each simulated graph. *Vice versa*, all feasible *qpAdm* models were checked by  
701 the PCA and/or *ADMIXTURE* methods.

702 We considered a two-way admixture model to be supported by PCA if the target group was  
703 located on a straight line between the two proxy source groups in the space of three PCs  
704 when all 13 simulated groups were co-analysed. Deviation from the straight line was  
705 acceptable to some extent as non-linear PCA clines are often observed on real data (de Barros  
706 Damgaard et al. 2018, Jeong et al. 2019), and they were also common among TP two-way  
707 *qpAdm* models in this study (see Methods for details and Figs. 3 and S4 for examples). This  
708 situation is expected since many targets in our simulations represent three-way and more  
709 complex mixtures, and since arrangement of populations in the PC space is influenced not  
710 only by admixture, but also by genetic drift (McVean 2009). Our requirements for a model to  
711 be declared supported by PCA were more stringent than those usually applied in the  
712 literature since we considered three-dimensional PC spaces instead of two-dimensional ones.  
713 Also see Methods for the rules we used to judge if an admixture model is supported by an  
714 unsupervised *ADMIXTURE* analysis, and see Figs. 3 and S4 for examples.

715 A much more limited form of group rotation, “model competition”, is used in the literature  
716 widely (Narasimhan et al. 2019, Fernandes et al. 2020, Calhoff et al. 2021, Sirak et al. 2021,  
717 Zhang et al. 2021, Maróti et al. 2022, Brielle et al. 2023, Lee et al. 2023), and we explored FDR  
718 of this method as well. A typical model competition protocol (Narasimhan et al. 2019, Maróti  
719 et al. 2022, Brielle et al. 2023) consists of two stages. First, the oldest, e.g., Palaeolithic,  
720 populations (and/or those most divergent from the target group) are used as a fixed “right”  
721 set, and populations sampled at later dates are used as proxy sources and targets. As usual,  
722 progressively more complex models are tested for targets of interest, and a composite  
723 feasibility criterion is applied.

724 In many publications (e.g., Haak et al. 2015, Mathieson et al. 2015, Antonio et al. 2019,  
725 Mathieson et al. 2018, Prendergast et al. 2019, Marcus et al. 2020, Papac et al. 2021, Wang  
726 et al. 2021, Yaka et al. 2021, Changmai et al. 2022a, 2022b, Patterson et al. 2022) this first  
727 non-rotating step remains the only *qpAdm* protocol used (in its distal or proximal forms). In  
728 a model competition protocol, subsequent analysis is focused on targets for whom two or  
729 more alternative *qpAdm* models emerge as feasible at the first step. For each target,  
730 alternative proxy sources are pooled and rotated between the “left” and “right” sets, testing  
731 only the models that emerged as feasible at the first step and applying a composite feasibility  
732 criterion (e.g.,  $p$ -value > 0.01, estimated admixture proportions  $\pm 2$  SE are within 0 and 1).

733 Rotation of alternative proxy sources can be performed in various ways: “whatever is not on  
734 the left is on the right” (Brielle et al. 2023), or placing alternative sources in the “right” set  
735 one by one (Calhoff et al. 2021, Maróti et al. 2022, Brielle et al. 2023). In the latter case several  
736 “right” sets are tested for each model, and the model is considered supported by the model  
737 competition protocol only if it is not rejected under any of these “right” sets (Maróti et al.  
738 2022). The reasoning behind this protocol is as follows: model rejection due to violations of  
739 the topological assumptions of *qpAdm* is not expected for a model composed of sources very  
740 close to the true ones since in this case branches private to the proxy sources are short, and  
741 it is unlikely that gene flows to or from the “right” set happened on these short branches.  
742 Models composed of sources closely related to the true ones are also not expected to be  
743 rejected when more distant proxy sources are placed in the “right” set (Harney et al. 2021).

744 For reasons detailed in the Discussion section, we explored the *qpAdm* model competition  
 745 protocol and multi-method admixture inference pipelines on one replicate per simulation  
 746 setup, and three (Table 3) or four (Table 1) simulation setups were involved in this analysis.

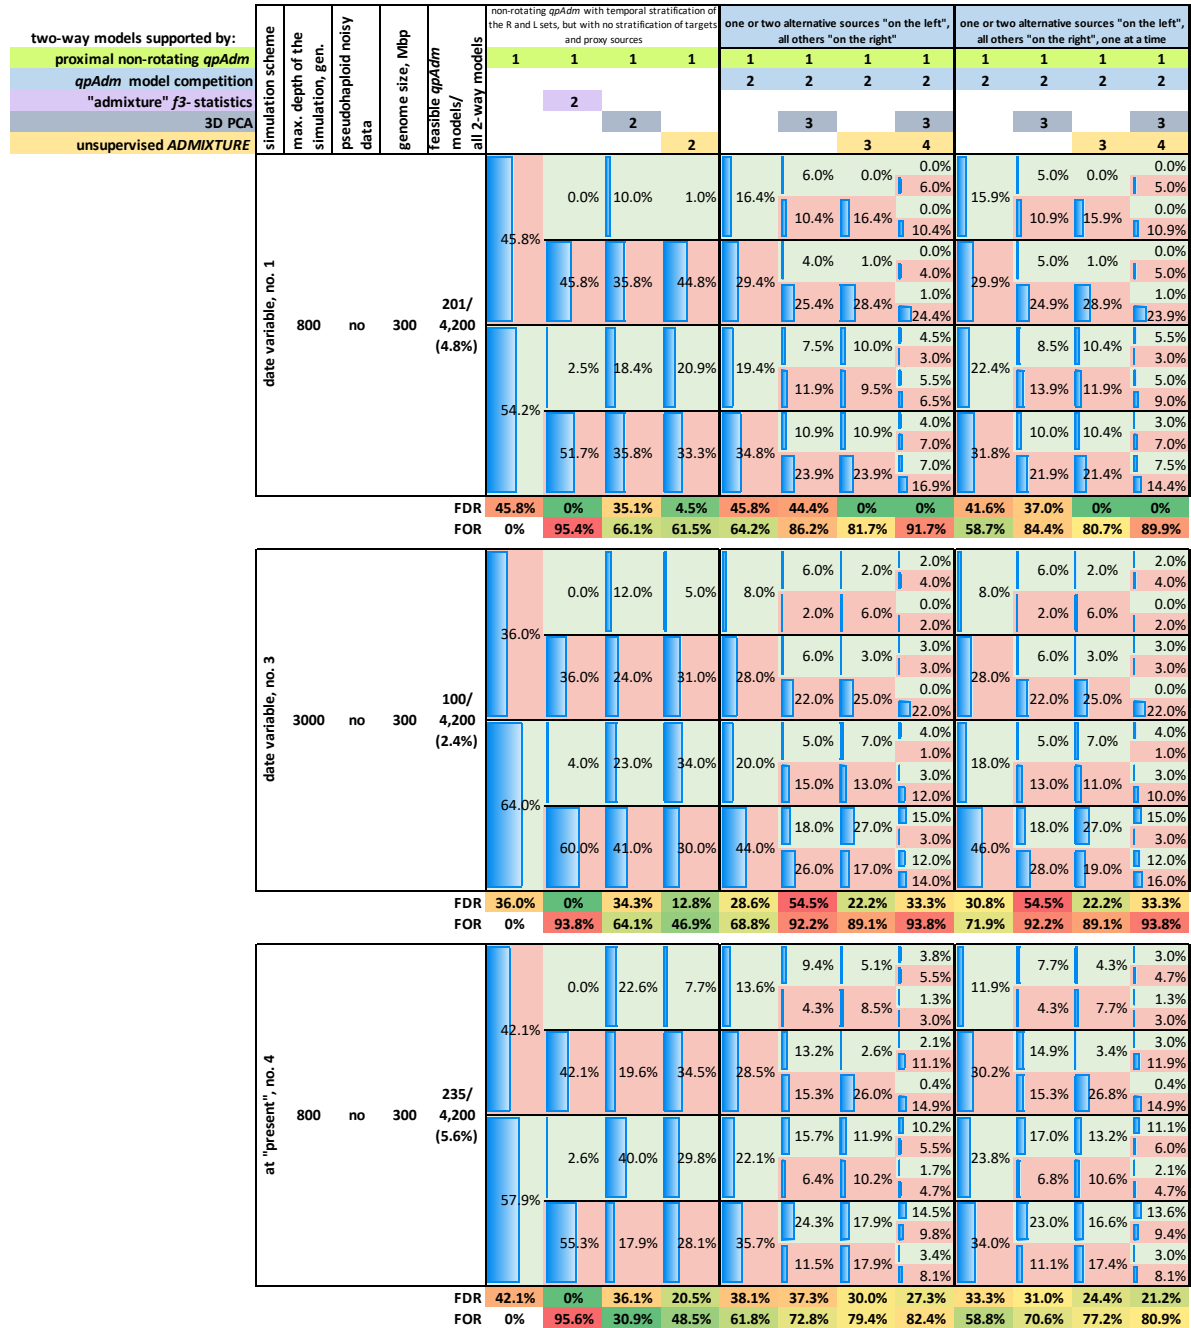

747

748 **Table 3.** Assessing FDR of the proximal non-rotating *qpAdm* protocol combined with model  
 749 competition (Narasimhan et al. 2019). For each simulation setup, the analysis relies on simulation  
 750 replicate no. 1 only. For constructing pipelines resembling those common in the archaeogenetic  
 751 literature, we used five methods: proximal non-rotating *qpAdm*, *qpAdm* model competition (two  
 752 alternative protocols), "admixture"  $f_3$ -statistics, 3D PCA with all individuals co-analysed, and  
 753 unsupervised *ADMIXTURE* with all individuals co-analysed. For declaring a positive result, support of  
 754 an admixture model by all methods in the pipeline was required, hence the order of methods is not



755 important except for the first method, which was the proximal non-rotating *qpAdm* in all cases. In  
756 each column, methods comprising a pipeline are color-coded and numbered by their order. All  
757 feasible two-way *qpAdm* models emerging as outcomes of the proximal non-rotating protocol were  
758 classified into FP and TP (highlighted in red and green in the leftmost column, respectively). The other  
759 columns are structured like bifurcating trees: FP *qpAdm* models supported by method no. 2; FP  
760 *qpAdm* models not supported by method no. 2; TP *qpAdm* models supported by method no. 2; TP  
761 *qpAdm* models not supported by method no. 2. The same principle is used for representing results of  
762 more complex pipelines. All model counts are normalized by the number of feasible *qpAdm* models  
763 (FP + TP), outcomes of the first method. Percentages of models supported/not supported by the last  
764 method in the pipeline are highlighted in green and red, respectively. FDR values are shown for these  
765 different pipelines. Fractions of TP *qpAdm* models that are pruned out by progressively more stringent  
766 support requirements are also shown (false omission rate or FOR).

767

768 The two alternative model competition protocols described above were applied to targets  
769 for whom more than one model was feasible given a fixed “right” set. If only one model was  
770 feasible for a target, such a model was evaluated as passing model competition (such models  
771 accounted only for 7%–11% of models feasible at the first step). The model competition  
772 protocols failed to improve *qpAdm* performance: FDR ranged from 29% to 46% (as compared  
773 to 36%–46% prior to the model competition step), and both model competition protocols  
774 demonstrated very similar results (Table 3). FOR of the model competition protocols varied  
775 from 59% to 72%. FDR also remained high for models supported by proximal non-rotating  
776 *qpAdm* & PCA or by proximal non-rotating *qpAdm* & model competition & PCA (Table 3).

777 Considering all simulation setups and replicates shown in Table 2, there were only 1,591  
778 instances when a two-way admixture model was supported by both the proximal rotating  
779 and proximal non-rotating protocols on the same simulated data. In contrast, there were  
780 5,844 and 24,046 instances when a model was supported exclusively by the proximal non-  
781 rotating and rotating protocols, respectively. Notably, FP models supported by the proximal  
782 non-rotating *qpAdm* protocol largely lacked support by an unsupervised *ADMIXTURE* analysis  
783 (Table 3), in contrast to outcomes of the proximal rotating protocol (Table S1). FDR of a  
784 pipeline composed of these two methods ranged from 5% to 21% across three simulation  
785 setups tested (Table 3). Adding a model competition step to this pipeline increased both FDR  
786 and FOR in 4 of 6 cases; and, in general, the proximal non-rotating *qpAdm* protocol combined  
787 with *ADMIXTURE* is the best-performing protocol in this analysis (Table 3) according to FDR  
788 and FOR.



789 The fact that our *ADMIXTURE* analysis supports a large fraction of FP two-way mixture models  
790 emerging as outcomes of the proximal rotating *qpAdm* protocol reflects known problems in  
791 modelling using *ADMIXTURE* very ancient individuals in the context of modern populations.  
792 These individuals are often modelled (Raghavan et al. 2014, Haak et al. 2015, Moreno-Mayar  
793 et al. 2018a) as complex mixtures of ancestry components typical for modern populations,  
794 which is obviously an artefact. Sampling dates for unique targets from FP models supported  
795 by both proximal rotating *qpAdm* and *ADMIXTURE* ranged from the present to 665  
796 generations in the past (median = 406 generations), while the median sampling date for  
797 unique targets from both FP and TP models supported by proximal rotating *qpAdm* was 215  
798 generations in the past (for comparison across simulation setups, all the dates were rescaled  
799 to a maximum simulation depth of 800 generations). The proximal non-rotating protocol by  
800 design did not consider the oldest groups as targets for *qpAdm* and *ADMIXTURE*, thus largely  
801 avoiding this problem (sampling dates for unique targets from FP models supported by both  
802 proximal non-rotating *qpAdm* and *ADMIXTURE* ranged from the present to 366 generations  
803 in the past; median = 44 generations).

804 Above we have discussed multi-method pipelines based on the proximal non-rotating *qpAdm*  
805 protocol. Combining distal *qpAdm* protocols with PCA allows to reduce FDR of both rotating  
806 and non-rotating protocols further, to 10%–24%, and distal *qpAdm* protocols combined with  
807 an unsupervised *ADMIXTURE* analysis demonstrated even better FDR values ca. 0%–8%  
808 (Table 1). If target and proxy source populations are sampled at approximately the same time  
809 (such as those from our simulation setup no. 4 and from the proximal analysis in Narasimhan  
810 et al. 2019, Fig. 2c) applying this approach is impossible. However, if our simulations with all  
811 branches extended to the present are treated in the same way as their topological  
812 counterparts with date-variable sampling, performance gains (decrease in FDR) of temporal  
813 stratification of admixture models are similar to those mentioned above (Table 1). In this case  
814 the temporal stratification procedure retains models with the latest admixture event in  
815 target’s history that is more recent than (or as recent as) the latest admixture events in proxy  
816 sources’ history. However, in the case of simulation setup no. 4 performance gains of the  
817 “*qpAdm* + PCA” and “*qpAdm* + *ADMIXTURE*” method combinations were moderate (Table 1).

818

## 819 Discussion

820 In this study we explored performance of various *qpAdm* protocols on a collection of random  
821 complex simulated genetic histories, where admixture history of target groups may vary from  
822 the simplest (no admixture) to very complex. It is because of this research design and other  
823 limitations discussed below that our study is focused mostly on one performance metric: false  
824 discovery rate or FDR. In simple terms, we focused our analysis only on models of a chosen  
825 complexity class (two-way models) supported by a *qpAdm* protocol (feasible models),  
826 classified them manually into false and true positives according to a set of topological rules,  
827 and subjected them to further screening by PCA and/or *ADMIXTURE* methods. We did not  
828 attempt to classify rejections of two-way models by *qpAdm* or other methods into false  
829 rejections due to violations of the topological assumptions of *qpAdm* (Fig. 1) and true  
830 rejections when the true admixture history of the target does not fit a two-way model. This  
831 problem was deliberately left out since in the literature more attention is paid to  
832 interpretation of “fitting” (“feasible” or “positive”) than rejected *qpAdm* models.

833 Another limitation of our study is that we had to use idealized versions of *qpAdm*, PCA, and  
834 *ADMIXTURE* protocols, while in the archaeogenetic literature manual adjustment of  
835 analytical protocols is common: protocols often vary from one target group to another (see,  
836 e.g., Lazaridis et al. 2016, Zhang et al. 2021, Brielle et al. 2023, Lee et al. 2023) and from study  
837 to study. These extensive details are very hard to formalize and reproduce. In the case of  
838 *qpAdm* protocols, certain groups of populations may be placed exclusively in the “right” or in  
839 the “left” sets, with the rest rotated between these sets, and relative sizes and compositions  
840 of these three groups vary from study to study: in the case of model competition protocols,  
841 this rotated subset is small, and rotation may be restricted to a particular model complexity  
842 class, but in other cases it may encompass all or nearly all populations analysed (see, e.g.,  
843 Narasimhan et al. 2019, Librado et al. 2021, Bergström et al. 2022, Lazaridis et al. 2022,  
844 Oliveira et al. 2022, Taylor et al. 2023). Reproducing all aspects of PCA and *ADMIXTURE*  
845 protocols used in the literature is also hardly possible on simulated data. For instance, PCs in  
846 archaeogenetic studies are usually calculated based on present-day populations, and ancient  
847 individuals are projected on the resulting PCs (e.g., Haak et al. 2015, Mathieson et al. 2018,  
848 Narasimhan et al. 2019, Furtwängler et al. 2020, Marcus et al. 2020, Lazaridis et al. 2022). In

849 contrast, in our study all simulated individuals were co-analysed for calculating PCs.  
850 *ADMIXTURE* analyses in the literature are usually performed on worldwide or continent-wide  
851 panels of populations that often overlap just partially with population sets used for *qpAdm*  
852 analyses (see, for instance, Rasmussen et al. 2010, Haak et al. 2015, Harney et al. 2018,  
853 Moreno-Mayar et al. 2018a, Zhang et al. 2021, Changmai et al. 2022a, Brielle et al. 2023),  
854 while in our study identical population sets were used for *qpAdm*, PCA, and *ADMIXTURE*  
855 analyses.

856 Another important caveat is that complexity of genetic history in the region and period of  
857 interest often remains unknown and it is difficult to judge if a particular admixture graph  
858 complexity is adequate for simulating the real history. However, we have not explored *qpAdm*  
859 performance over a range of simulated admixture graph complexities, over a range of model  
860 feasibility criteria (except for those in Table S2), for models more complex than two-way, and  
861 have estimated FDR and FOR instead of false positive and false negative rates due to an  
862 important technical limitation: the process of model classification into true and false ones  
863 cannot be fully automated since it requires careful interpretation of the simulated topology  
864 and simulated admixture proportions. For similar reasons, some comparisons of method  
865 performance in this study, such as *qpAdm* vs. “*qpAdm* combined with *ADMIXTURE*”, are  
866 qualitative rather than quantitative: we applied the PCA and *ADMIXTURE* methods to one  
867 simulation replicate only per simulation setup since automated classifiers of admixture  
868 models into positive and negative ones based on 3D PCA and *ADMIXTURE* results were not  
869 available. Despite these limitations, our simulations reproduce the most important aspects  
870 of typical *qpAdm* protocols.

871 We demonstrated that application of the proximal rotating *qpAdm* protocol that can be  
872 summarized as “whatever is not on the right is on the left” without any temporal stratification  
873 of the “right” and “left” sets and of proxy sources and targets carries a risk of an FDR above  
874 50% or 60%. Adding further levels of support (considering only models supported by PCA  
875 and/or an *ADMIXTURE* analysis) does not help to decrease FDR drastically in this case (Table  
876 S1, Suppl. text 1).

877 The proximal rotating protocol is an extreme example of *qpAdm* protocols that is rarely  
878 encountered in the archaeogenetic literature (Calhoff et al. 2021, Oliveira et al. 2022) but

879 serves as a reference point in our analysis. Other protocols such as distal rotating (e.g.,  
880 Narasimhan et al. 2019, Librado et al. 2021, Allentoft et al. 2022, Bergström et al. 2022,  
881 Lazaridis et al. 2022, Taylor et al. 2023), distal non-rotating (e.g., Haak et al. 2015, Mathieson  
882 et al. 2015, Lazaridis et al. 2016, Antonio et al. 2019, Marcus et al. 2020, Yang et al. 2020,  
883 Papac et al. 2021, Yaka et al. 2021, Patterson et al. 2022), and proximal model competition  
884 (e.g., Narasimhan et al. 2019, Calhoff et al. 2021, Zhang et al. 2021, Maróti et al. 2022, Brielle  
885 et al. 2023, Lee et al. 2023) are often used in practice, and FDR of these three classes of  
886 protocols on our simulated data ranged from 12% to 46% across simulation parameter  
887 combinations and replicates (Tables 1 and 3). These FDR for best-performing standalone  
888 *qpAdm* protocols are high but should not be over-interpreted since they are expected to  
889 depend on the complexity of simulated histories and on the amount of data (Table 2), which  
890 also depends on the time depth of simulated histories (Fig. S3). Only one graph complexity  
891 level was tested, that is 13 groups and 10 admixture events; and only one time depth, 800  
892 generations, was tested in a high-throughput way (Table 1). Thus, it is hard to extrapolate this  
893 aspect of our results to real analyses and predict FDR levels on real data.

894 Temporal stratification tested in this study and practiced in the literature is of two sorts: 1)  
895 most or all populations in the “right” set are sampled deeper in the past than those in the  
896 “left” set (non-rotating protocols); 2) a target group post-dates (or is as old as) all its proxy  
897 sources (distal protocols). We showed that both temporal stratification approaches helped  
898 to decrease FDR of *qpAdm* admixture screens significantly, and the latter approach  
899 demonstrated the best FDR among standalone *qpAdm* protocols (Table 2).

900 Although restricting analyses to distal models is often *necessary* for reducing FDR below an  
901 arbitrary threshold at 10%, it is not *sufficient* for reaching this objective (Table 1) given the  
902 complexity of our simulated admixture graph-shaped histories and the amounts of data we  
903 generated. Respecting this threshold, only the following admixture screening protocols  
904 demonstrated acceptable performance (we did not consider protocols demonstrating FOR  
905 above 90% as useful in practice):

906 1) proximal non-rotating *qpAdm* with a requirement that admixture models are supported by  
907 both *qpAdm* and an unsupervised *ADMIXTURE* analysis (Tables 1 and 3), under simulation

908 setups no. 1 and 2 (groups sampled at different dates in the past, maximal simulated history  
909 depth = 800 generations, 300-Mbp-sized or 1000-Mbp-sized genomes simulated);

910 2) distal non-rotating or rotating *qpAdm* with a requirement that admixture models are  
911 supported by both *qpAdm* and an unsupervised *ADMIXTURE* analysis (Table 1), under  
912 simulation setups no. 1, 2, and 3 (groups sampled at different dates in the past, maximal  
913 simulated history depth = 800 or 3000 generations, 300-Mbp-sized or 1000-Mbp-sized  
914 genomes simulated).

915 FDR of these protocols was 0% – 8% (Table 1). In contrast, adding a model competition step  
916 to the proximal non-rotating *qpAdm* protocol did not help to reduce FDR below 10%. The  
917 performance of this type of protocols is explored in detail in Table 3. To sum up, we make the  
918 following suggestions for improving robustness of admixture inference in archaeogenetics:

919 1. Our results suggest that temporal stratification of targets and proxy sources is a very  
920 efficient way of reducing FDR of *qpAdm* protocols (Tables 1 and 2, Fig. 4). The distal  
921 rotating and non-rotating protocols invariably demonstrated FDR significantly lower than  
922 those of the proximal non-rotating and rotating protocols (Table 2). Although the  
923 proximal model competition protocol (Narasimhan et al. 2019, Calhoff et al. 2021, Zhang  
924 et al. 2021, Maróti et al. 2022, Brielle et al. 2023, Lee et al. 2023) was not tested on  
925 multiple simulation or subsampling replicates (Table 3, we note that it demonstrated FDR  
926 values higher than those of the distal non-rotating protocol (Table 1). Our results imply  
927 that *qpAdm* protocols where all populations are sampled at present (similar to our setup  
928 no. 4; see also Jeong et al. 2019, Changmai et al. 2022a) or where present-day groups are  
929 used as proxy ancestry sources for ancient groups (e.g., Mathieson et al. 2015, van de  
930 Loosdrecht et al. 2018, Narasimhan et al. 2019, Prendergast et al. 2019, Shinde et al. 2019,  
931 Wang et al. 2020, Wang et al. 2021, Changmai et al. 2022b, Calhoff et al. 2021, Oliveira et  
932 al. 2022) are less reliable than those where target groups are not allowed to pre-date  
933 their proxy sources. While the proximal non-rotating *qpAdm* protocol demonstrated FDR  
934 significantly lower than that of the proximal rotating protocol (Table 2), the distal rotating  
935 protocol was in terms of FDR as good as the distal non-rotating protocol (on low-quality  
936 data) or significantly better (on high-quality data, Table 2).

- 937 2. Another way of radically improving FDR of *qpAdm* protocols is combining *qpAdm* with an  
938 unsupervised *ADMIXTURE* analysis. These two approaches should probably be combined  
939 for optimal performance (Table 1).
- 940 3. Adding 3.3 times more data led to a small but significant decrease in FDR only in the case  
941 of high-quality diploid data, but not in the case of pseudo-haploid data with high missing  
942 rates (Table 2). This observation deserves further investigation.
- 943 4. It is safest to use the *qpAdm* method in controlled conditions, when relationships among  
944 populations are understood well enough to exclude violations of the topological  
945 assumptions, when radiocarbon or context dates of ancient populations are reliable and  
946 allow accurate temporal stratification, or when sets of potential proxy sources are well-  
947 constrained based on archaeological or historical scholarship: see, for instance, the  
948 earliest publications where the *qpAdm* method was employed (Haak et al. 2015,  
949 Mathieson et al. 2015) and some recent studies (e.g., Marcus et al. 2020, Papac et al.  
950 2021, Yaka et al. 2021, Changmai et al. 2022a, 2022b, Patterson et al. 2022). Obviously,  
951 the amount of new information that the *qpAdm* method provides in these conditions is  
952 limited. However, considering that it was possible to reach FDR levels as low as 0% to 8%  
953 on our simulated data, we do not recommend avoiding *qpAdm*-based high-throughput  
954 admixture screens altogether.
- 955 5. Summing up all the results above, for reducing FDR of *qpAdm* admixture screens to nearly  
956 0% we suggest using large SNP sets with low missing data rates, using the rotating *qpAdm*  
957 protocol with a strictly enforced rule that targets do not pre-date their proxy sources, and  
958 performing an unsupervised *ADMIXTURE* analysis to verify feasible *qpAdm* models.
- 959 6. Our study has multiple limitations and caveats discussed above, mostly related to  
960 difficulties in simulating all the details of published *qpAdm*, PCA, and *ADMIXTURE*  
961 protocols, to uncertainties about the level of admixture graph complexity that is adequate  
962 for simulating real population histories (all our simulations were of the same complexity:  
963 13 groups and 10 pulse-like admixture events), to difficulties in interpreting topologies of  
964 random admixture graphs in an automated way for classifying even simple admixture  
965 models into true and false ones, and to difficulties in interpreting 3D PCA and *ADMIXTURE*  
966 results in an automated way. Nevertheless, our results surpass in scale previous  
967 simulation studies of *qpAdm* protocols (Lazaridis et al. 2017, Ning et al. 2020, Harney et

968 al. 2021) by several orders of magnitude and may serve as a guide for users of high-  
969 throughput *qpAdm* protocols.

970 7. Feasible *qpAdm* models are sometimes ranked by *p*-values, with a model having the  
971 highest *p*-value highlighted as the most plausible one (see, for instance, Lazaridis et al.  
972 2022, van de Loosdrecht et al. 2018, Oliveira et al. 2022, Taylor et al. 2023). *qpWave* *p*-  
973 values for pairs of individuals were also used in lieu of genetic distances in the former  
974 study (Lazaridis et al. 2022). Of 1,201 instances when both false and true feasible *qpAdm*  
975 models were found for the same target group on the same data (all simulation setups,  
976 simulation/subsampling replicates, and *qpAdm* protocols), a model having the highest *p*-  
977 value was an FP in 463 (38.6%) cases, and the difference in maximal *p*-values between the  
978 TP and FP model classes was significant according to the paired two-sided Wilcoxon test  
979 (TP > FP, *p*-value =  $2.2 \times 10^{-16}$ ). Thus, our limited analysis suggests that the approach of  
980 ranking *qpAdm* models by *p*-values is justified (see also related results in Fig. S6 and Table  
981 S2), but it generates noisy results.

982 8.  $f_3$ -statistic is a simple method for proving that a population is admixed, and it  
983 demonstrated FDR values much lower (6%, see Suppl. text 1) than those of standalone  
984 *qpAdm* protocols, but  $f_3$ -statistics are applicable only to recent admixture events and/or  
985 populations of large effective size since post-admixture drift on the target lineage  
986 obscures the signal. Moreover, calculating  $f_3$ -statistics for a target composed of a single  
987 pseudo-haploid individual is impossible since a heterozygosity estimate is required (Maier  
988 et al. 2022), and such singleton groups are common in archaeogenetic studies.  
989 Researchers should also be aware that  $f_3$ -statistics are defined on unrooted trees, and  
990 that may lead to rare but strong false signals of admixture (Fig. S4e).

991

## 992 **Methods**

### 993 ***Simulating random admixture graphs with msprime v.1.1.1***

994 For simulating genetic data, we used *msprime v.1.1.1* which allows accurate simulation of  
995 recombination and of multi-chromosome diploid genomes relying on the Wright-Fisher  
996 model (Nelson et al. 2020, Baumdicker et al. 2022). We simulated three or ten diploid



997 chromosomes (each 100 Mbp long) by specifying a flat recombination rate ( $2 \times 10^{-8}$  per nt per  
998 generation) along the chromosome and a much higher rate at the chromosome boundaries  
999 ( $\log_2$  or  $\sim 0.693$  per nt per generation, see  
1000 <https://tskit.dev/msprime/docs/stable/ancestry.html#multiple-chromosomes>). A flat  
1001 mutation rate,  $1.25 \times 10^{-8}$  per nt per generation (Scally & Durbin 2012), and the binary  
1002 mutation model were used. To maintain the correct correlation between chromosomes, the  
1003 discrete time Wright-Fischer model was used for 25 generations into the past, and deeper in  
1004 the past the standard coalescent simulation algorithm was used (as recommended by Nelson  
1005 et al. 2020).

1006 Genetic histories in the form of random admixture graphs including 13 populations and 10  
1007 pulse-like admixture events were generated using the *random\_admixturegraph* and  
1008 *random\_sim* functions from the *ADMIXTOOLS 2* package  
1009 ([https://uqrmaie1.github.io/admixtools/reference/random\\_sim.html](https://uqrmaie1.github.io/admixtools/reference/random_sim.html)), which produced  
1010 scripts for running the *msprime v.1.1.1* simulator. Demographic events were separated by  
1011 date intervals ranging randomly between 20 and 120 generations, with an upper bound on  
1012 the graph depth at 800 generations (or ca. 23,000 years in the case of humans). In another  
1013 set of simulations, all the dates were scaled up 3.75 times, with an upper bound on the graph  
1014 depth at 3,000 generations (or 87,000 years in the case of humans). To be more precise,  
1015 demographic events were not placed in time entirely randomly, but were tied to one or few  
1016 other events of the same “topological depth” within the graph, as illustrated by five examples  
1017 of the simulated topologies in Fig. S2. The same principle was applied to sampling dates,  
1018 which were tied to other demographic events such as divergence and admixture of other  
1019 populations. This was done to ensure topological consistency of random graphs.

1020 Ten diploid individuals with no missing data were sampled from each population at “leaves”  
1021 of the graph. Effective population sizes were constant along each edge and were picked  
1022 randomly from the range of 1,000 – 10,000 diploid individuals. Admixture proportions for all  
1023 admixture events varied randomly between 10% and 50%. This setup generates groups  
1024 sampled at widely different dates in the past or, in other words, located at various genetic  
1025 distances from the root. Alternatively, all terminal branches were extended to the “present”  
1026 of the simulation and sampled at “present”, keeping their respective effective population



1027 sizes and topological relationships unchanged. Thus, another set of simulations was  
1028 generated for the same topologies, where groups were more drifted with respect to each  
1029 other (see  $F_{ST}$  distributions in Fig. S1).

1030 In summary, four sets of independent simulations differing by the amount of data generated  
1031 and by population divergence metrics were performed for a set of 40 random admixture  
1032 graph topologies:

1033 1) three 100-Mbp-sized chromosomes; groups sampled at different points in time; maximal  
1034 simulated history depth at 800 generations (10 simulation replicates, median number of  
1035 polymorphic sites = 669,655, see Fig. S3);

1036 2) ten 100-Mbp-sized chromosomes; groups sampled at different points in time; maximal  
1037 simulated history depth at 800 generations (10 simulation replicates, median number of  
1038 polymorphic sites = 2,229,459);

1039 3) three 100-Mbp-sized chromosomes; groups sampled at different points in time; maximal  
1040 simulated history depth at 3,000 generations (one simulation replicate, median number of  
1041 polymorphic sites = 1,074,336);

1042 4) three 100-Mbp-sized chromosomes; all terminal branches extended to the "present" of the  
1043 simulation and sampled at that point; maximal simulated history depth at 800 generations  
1044 (one simulation replicate, median number of polymorphic sites = 838,297).

1045 To create more realistic datasets, we performed randomised subsampling of polymorphic  
1046 sites and individuals (replicates no. 1 of the first and second simulation setups were used for  
1047 this, see the list above). First, we randomly sampled alleles at heterozygous sites, creating  
1048 pseudo-haploid data. Then we introduced missing data by randomly selecting a missing rate  
1049 between 5% and 95%, followed by randomly selecting sites according to the missing rate. This  
1050 site subsampling was repeated for each individual independently. Lastly, we randomly  
1051 sampled  $n$  (from 1 to 10) individuals from each population independently. The subsampling  
1052 procedure described above was conditioned on the number of sites polymorphic in the set  
1053 of 13 simulated populations and was repeated until a subsampling replicate with more than  
1054 20,000 (for 300-Mbp-sized genomes) or 66,000 such sites (for 1000-Mbp-sized genomes) was

1055 obtained. We generated 10 independent subsampled replicates for each topology and  
1056 simulation setup (800 replicates in total).

1057 Polymorphism data in the *EIGENSTRAT* format were generated from the tree sequences using  
1058 the *TreeSequence.genotype\_matrix* function ([https://tskit.dev/tskit/docs/stable/python-  
1059 api.html#tskit.TreeSequence.genotype\\_matrix](https://tskit.dev/tskit/docs/stable/python-api.html#tskit.TreeSequence.genotype_matrix)) and used for all subsequent analyses (*f*-  
1060 statistics and *qpAdm*, PCA, *ADMIXTURE*).

1061 For all the work on *f*-statistics and *qpAdm*, the *ADMIXTOOLS 2* software package (Maier et al.  
1062 2022) was used. For diploid SNP sets without missing data, we first calculated all possible *f*<sub>2</sub>-  
1063 statistics for 4-Mbp-sized genome blocks (with the "*maxmiss=0*",  
1064 "*adjust\_pseudohaploid=FALSE*", and "*minac2=FALSE*" settings) and then used them for  
1065 calculating *f*<sub>3</sub>- and *f*<sub>4</sub>-statistics as linear combinations of *f*<sub>2</sub>-statistics and for testing *qpAdm*  
1066 models using the *qpadm* function in *ADMIXTOOLS 2*  
1067 (<https://uqrmaie1.github.io/admixtools/>) under default settings. Inferred admixture  
1068 proportions were not constrained between 0 and 1. For pseudo-haploid SNP sets with missing  
1069 data and uneven group sizes, the *qpadm* function was applied directly to genotype files, with  
1070 the "*allsnps=TRUE*" setting. In other words, *f*<sub>4</sub>-statistics utilized by *qpAdm* and *f*<sub>3</sub>-statistics  
1071 were calculated off the genotype files without intermediate *f*<sub>2</sub>-statistics, and removal of  
1072 missing data was done for each population quadruplet or triplet separately. This setup is  
1073 often used in the literature in the presence of missing data (e.g., Harney et al. 2018, Harney  
1074 et al. 2019, Narasimhan et al. 2019, Lazaridis et al. 2022).

1075

### 1076 ***Rotating qpAdm protocols***

1077 *QpWave* tests were performed on sets of 13 groups divided randomly into 2 "left" and 11  
1078 "right" groups, testing all possible bisections of this form. *QpAdm* was applied to the same  
1079 sets of 13 groups divided randomly into 3 "left" and 10 "right" groups, testing all possible  
1080 bisections of this form for all possible target groups in "left" sets. This proximal rotating  
1081 protocol was applied to all simulation setups. Subsequent work was focused only on feasible  
1082 *qpAdm* models defined as follows: 1) *p*-values calculated by *qpWave* for one-way models  
1083 "target = proxy source<sub>1</sub>", "target = proxy source<sub>2</sub>", and "proxy source<sub>1</sub> = proxy source<sub>2</sub>" are all

1084 below 0.01; 2) in the case of the two-way model "target = proxy source<sub>1</sub> + proxy source<sub>2</sub>",  
1085 estimated admixture proportions  $\pm 2$  standard errors are between 0 and 1; 3) the  $p$ -value  
1086 calculated by *qpAdm* for the two-way model  $\geq 0.01$ .

1087 For exploring performance of the distal rotating protocol, feasible two-way *qpAdm* models  
1088 were simply filtered according to sampling dates of target groups and proxy sources. If target  
1089 group's sampling date is equal to or smaller than sampling dates of both proxy sources, such  
1090 a model was considered distal.

1091

### 1092 ***Non-rotating and model competition qpAdm protocols***

1093 In the non-rotating protocol, for each simulated admixture graph six oldest groups were  
1094 selected as a fixed "right" set (ties in sampling dates were resolved in alphabetical order;  
1095 these "right" sets remained unchanged for a given topology across all independent  
1096 simulations), and for the remaining seven groups all possible one-way and two-way  
1097 admixture models were tested (105 models), applying the same composite feasibility  
1098 criterion that was used above for the rotating protocol. This is the proximal non-rotating  
1099 protocol, and alternatively we focused on distal admixture models only (distal non-rotating  
1100 protocol).

1101 In the proximal model competition protocol, subsequent analysis was focused on targets for  
1102 whom two or more alternative *qpAdm* models emerged as feasible at the first step. For each  
1103 target, alternative proxy sources were pooled and rotated between the "left" and "right" sets,  
1104 testing only the models that emerged as feasible at the first step and applying the composite  
1105 feasibility criterion ( $p$ -value  $\geq 0.01$ , estimated admixture proportions  $\pm 2$  SE are between 0  
1106 and 1). Rotation of alternative proxy sources was performed in two alternative ways:  
1107 "whatever is not on the left is on the right", or placement of alternative sources in the "right"  
1108 set one by one. In the latter case several "right" sets were tested for each model, and the  
1109 model was considered supported by the model competition protocol only if it was not  
1110 rejected under any of these "right" sets (the latter protocol follows Maróti et al. 2022). If only  
1111 one model was feasible for a target, such a model was evaluated as passing the model  
1112 competition procedure. A distal model competition protocol was not tested in this study.

1113 For testing statistical significance of differences in FDR between *qpAdm* protocols, the  
1114 following approach was used. FDR was calculated either on low-quality data for 10 random  
1115 site/individual subsampling replicates derived from simulation replicate no. 1 (simulation  
1116 setups no. 1 and 2) or on high-quality data for 10 independent simulation replicates  
1117 (simulation setups no. 1 and 2). Comparisons of four *qpAdm* protocols (rotating and non-  
1118 rotating, proximal and distal) were performed independently on these four sets of replicates,  
1119 using the two-sided paired Wilcoxon test (Table 2). Comparisons of the same *qpAdm* protocol  
1120 on lower and higher amounts of data (300-Mbp- vs. 1,000-Mbp-sized simulated genomes)  
1121 were performed using the two-sided (non-paired) Wilcoxon test since simulation replicates  
1122 were independent unlike alternative *qpAdm* protocols applied to the same data (Table 2).

1123

#### 1124 ***Classifying two-way admixture models into false and true positives***

1125 Since the simulated admixture graph topologies were complex and random, target groups  
1126 modelled with *qpAdm* had very complex admixture history in some cases, being a part of  
1127 gene flow networks. In this context it is hard to draw a strict boundary between true and false  
1128 admixture models composed of a target and only two proxy sources. Two-way admixture  
1129 models were considered false only if at least one of the following criteria was satisfied  
1130 (considering only graph topologies and admixture proportions):

- 1131 1. The target and at least one of the proxy sources are simulated as strictly cladal (Fig. 3). In  
1132 this case the target may either be unadmixed, or it may have experienced gene flows  
1133 earlier in its history that do not break its cladality with one of the proxy sources;
- 1134 2. A proxy source does not represent any true source. In other words, it is symmetrically  
1135 related to all true sources of ancestry in the target (Fig. S4a). Alternatively, both proxy  
1136 sources represent the same true source, and are symmetrically related to all the other  
1137 true sources (Fig. S4b).
- 1138 3. A proxy source shares genetic drift with the corresponding true source that is not shared  
1139 by the second proxy source (and the same is true for the other proxy source and another  
1140 true source, i.e., condition no. 2 above is not satisfied), however less than 40% of its  
1141 ancestry is derived from the true source (Fig. S4c);

1142 4. A proxy source lineage is a recipient of gene flow from the target lineage (after the last  
1143 admixture event in target's history), possibly mediated by other lineages (Fig. 3, Fig. S4d).  
1144 In other words, the incorrect proxy source is a descendant of the target lineage, i.e., the  
1145 expected gene flow direction is reversed.

1146 We illustrate these topological rules with five examples of FP and feasible *qpAdm* models in  
1147 Fig. 3 and Fig. S4a-e. Two-way models for targets whose population history is best  
1148 approximated with three-way and more complex models were considered as true positives if  
1149 they included source proxies (that do *not* satisfy the criteria above) for at least two of three  
1150 or more true ancestry sources.

1151

### 1152 ***Principal component analysis***

1153 PCA was performed for one simulation replicate per simulation setup. Prior to the analysis,  
1154 linked sites were pruned with *PLINK v.2.00a3LM* (Chang et al. 2015) using the following  
1155 settings: window size, 2000 SNPs; window step, 100 SNPs;  $r^2$  threshold = 0.5 (argument "--  
1156 indep-pairwise 2000 100 0.5"). PCA was also performed using *PLINK v.2.00a3LM* under  
1157 default settings, calculating 10 PCs. Interactive three-dimensional plots visualizing PC1, PC2,  
1158 and PC3 were made using the *plotly* R package. A two-way admixture model was considered  
1159 supported by PCA if:

- 1160 1. the target group (the center of the cluster of target individuals, to be precise) lay between  
1161 the clusters of proxy source individuals on a straight line in the three-dimensional PC  
1162 space;
- 1163 2. or if it was located at a distance of no more than three target cluster diameters from that  
1164 straight line connecting the proxy source clusters.

1165 The second pattern was more common among both TP and FP two-way admixture models:  
1166 1.5 and 1.3 times, respectively (across all non-sampled simulated datasets). This situation  
1167 is expected since many targets represent three-way and more complex mixtures, and since  
1168 arrangement of populations in the PC space is influenced not only by admixture, but also by  
1169 genetic drift.

1170

1171 ***ADMIXTURE analysis***

1172 *ADMIXTURE* analysis was performed for one simulation replicate per simulation setup. Prior  
1173 to the analysis, linked sites were pruned with *PLINK v.2.00a3LM* (Chang et al. 2015) using the  
1174 following settings: window size, 2000 SNPs; window step, 100 SNPs;  $r^2$  threshold = 0.5  
1175 (argument "--indep-pairwise 2000 100 0.5"). *ADMIXTURE v.1.3* (Alexander et al. 2009) was  
1176 used in the unsupervised mode under the default settings. The algorithm was run on each  
1177 SNP dataset only once, with the number of hypothetical ancestral populations ( $K$ ) ranging  
1178 from 3 to 10. This range was selected since the total number of populations in each simulated  
1179 history was 13. A two-way admixture model was considered supported by *ADMIXTURE*  
1180 analysis if:

- 1181 1. for at least one  $K$ , at least 5 of 10 target individuals were modelled as a mixture of at least  
1182 two ancestry components, with a minor ancestry component exceeding 2%;
- 1183 2. typically, ancestry component  $A$  in the target group was shared with at least 5 individuals  
1184 in proxy source 1, but not in proxy source 2, and ancestry component  $B$  was shared with  
1185 at least 5 individuals in proxy source 2, but not in proxy source 1 (see examples in Fig. 3  
1186 and Fig. S4); in some cases, both components  $A$  and  $B$  were found in the proxy sources,  
1187 but in varying proportions;
- 1188 3. if only one ancestry component in the target was shared with the two proxy sources, the  
1189 model was considered unsupported;
- 1190 4. ancestry components in the target that are absent in any of the sources were ignored  
1191 since three-way and more complex admixture histories are common in the set of random  
1192 admixture graphs explored here;
- 1193 5. ancestry components in a proxy source that are absent in the target were also ignored  
1194 since a proxy source may not be fully cladal with the real source.

1195 These rules were designed to reproduce typical reasoning of an archaeogeneticist  
1196 interpreting *ADMIXTURE* results. Observing a pattern of ancestry components in the target  
1197 group and proxy sources compatible with the admixture model "target = proxy source<sub>1</sub> +  
1198 proxy source<sub>2</sub>" for one  $K$  value was enough for declaring that the model is supported by the  
1199 *ADMIXTURE* analysis. This condition was motivated by an observation that models supported

1200 at one  $K$  value only were equally common among FP and TP *qpAdm* models (10% and 13%,  
1201 respectively, across four simulation setups). Models supported at four or more  $K$  values were  
1202 more common among TP *qpAdm* models (3.3% of FP and 12.6% of TP models across four  
1203 simulation setups).

1204

## 1205 ***Probability density curves for radiocarbon and calendar dates***

1206 Probability density curves for published radiocarbon and calendar dates were constructed in  
1207 *OxCal v.4.4*. For calendar dates, we used the *C-Simulate* function in *OxCal v.4.4* for simulating  
1208 normally distributed dating methods, taking the average calendar date as a median and the  
1209 length of the timespan as a 95% confidence interval. For radiocarbon dates, we used  
1210 calibration based on the IntCal20 calibration curve. Probability densities were summarized  
1211 using the *Sum* function in *OxCal v.4.4* for each of the three groups of individuals, those  
1212 included in the "left", "right", and "target" population sets in at least one of the published  
1213 *qpAdm* models (Narasimhan et al. 2019, Lazaridis et al. 2022), and then plotted together.

1214

## 1215 **Acknowledgements**

1216 P.F. and P.C. were supported by the Czech Science Foundation (project no. 21-27624S). P.F.  
1217 was also supported by the John Templeton Foundation (grant no. 61220 to David Reich) and  
1218 by a gift from Jean-Francois Clin. U.I. and L.A.V. were supported by the Czech Ministry of  
1219 Education, Youth and Sports (program ERC CZ, project no. LL2103). Computational resources  
1220 for this work were supplied by the projects "e-INFRA CZ" (no. 90140) and "IT4Innovations  
1221 National Supercomputing Center" (no. LM2015070) supported by the Ministry of Education,  
1222 Youth and Sports of the Czech Republic, and by the ELIXIR-CZ project (no. LM2022123), a part  
1223 of the international ELIXIR infrastructure.

1224

## 1225 **References**

1226 1. Alexander DH, Novembre J, Lange K. Fast model-based estimation of ancestry in unrelated



- 1227 individuals, *Genome Res.* **19** (2009) 1655–1664. doi: 10.1101/gr.094052.109.
- 1228 2. Allentoft ME, Sikora M, Refoyo-Martínez A, *et al.* Population Genomics of Stone Age Eurasia.  
1229 *bioRxiv.* (2022). doi: 10.1101/2022.05.04.490594.
- 1230 3. Antonio ML, Gao Z, Moots HM, Lucci M, Candilio F, Sawyer S, Oberreiter V, Calderon D,  
1231 Devitofranceschi K, Aikens RC, Aneli S, Bartoli F, Bedini A, Cheronet O, Cotter DJ, Fernandes DM,  
1232 Gasperetti G, Grifoni R, Guidi A, La Pastina F, Loreti E, Manacorda D, Matullo G, Morretta S,  
1233 Nava A, Fiocchi Nicolai V, Nomi F, Pavolini C, Pentiricci M, Pergola P, Piranomonte M, Schmidt R,  
1234 Spinola G, Sperduti A, Rubini M, Bondioli L, Coppa A, Pinhasi R, Pritchard JK. Ancient Rome: A  
1235 genetic crossroads of Europe and the Mediterranean. *Science.* **366** (2019) 708–714. doi:  
1236 10.1126/science.aay6826.
- 1237 4. Baumdicker F, Bisschop G, Goldstein D, Gower G, Ragsdale AP, Tsambos G, Zhu S, Eldon B,  
1238 Ellerman EC, Galloway JG, Gladstein AL, Gorjanc G, Guo B, Jeffery B, Kretzschmar WW, Lohse K,  
1239 Matschiner M, Nelson D, Pope NS, Quinto-Cortés CD, Rodrigues MF, Saunack K, Sellinger T,  
1240 Thornton K, van Kemenade H, Wohns AW, Wong Y, Gravel S, Kern AD, Koskela J, Ralph PL,  
1241 Kelleher J. Efficient ancestry and mutation simulation with msprime 1.0, *Genetics.* **220** (2022)  
1242 iyab229. doi: 10.1093/genetics/iyab229.
- 1243 5. Bergström A, Stanton DWG, Taron UH, Frantz L, Sinding MS, Ersmark E, Pfrengle S, Cassatt-  
1244 Johnstone M, Lebrasseur O, Girdland-Flink L, Fernandes DM, Ollivier M, Speidel L,  
1245 Gopalakrishnan S, Westbury MV, Ramos-Madrigal J, Feuerborn TR, Reiter E, Gretzinger J, Münzel  
1246 SC, Swali P, Conard NJ, Carøe C, Haile J, Linderholm A, Androsov S, Barnes I, Baumann C,  
1247 Benecke N, Bocherens H, Brace S, Carden RF, Drucker DG, Fedorov S, Gasparik M, Germonpré M,  
1248 Grigoriev S, Groves P, Hertwig ST, Ivanova VV, Janssens L, Jennings RP, Kasparov AK, Kirillova IV,  
1249 Kurmaniyazov I, Kuzmin YV, Kosintsev PA, Lázníčková-Galetová M, Leduc C, Nikolskiy P,  
1250 Nussbaumer M, O'Driscueil C, Orlando L, Outram A, Pavlova EY, Perri AR, Pilot M, Pitulko VV,  
1251 Plotnikov VV, Protopopov AV, Rehazek A, Sablin M, Seguin-Orlando A, Storå J, Verjux C, Zaibert  
1252 VF, Zazula G, Crombé P, Hansen AJ, Willerslev E, Leonard JA, Götherström A, Pinhasi R,  
1253 Schuenemann VJ, Hofreiter M, Gilbert MTP, Shapiro B, Larson G, Krause J, Dalén L, Skoglund P.  
1254 Grey wolf genomic history reveals a dual ancestry of dogs, *Nature.* **607** (2022) 313–320. doi:  
1255 10.1038/s41586-022-04824-9.
- 1256 6. Brielle ES, Fleisher J, Wynne-Jones S, Sirak K, Broomandkoshbacht N, Callan K, Curtis E, Iliev L,  
1257 Lawson AM, Oppenheimer J, Qiu L, Stewardson K, Workman JN, Zalzalá F, Ayodo G, Gidna AO,  
1258 Kabiru A, Kwekason A, Mabulla AZP, Manthi FK, Ndiema E, Ogola C, Sawchuk E, Al-Gazali L, Ali  
1259 BR, Ben-Salem S, Letellier T, Pierron D, Radimilahy C, Rakotoarisoa JA, Raam RL, Culleton BJ,  
1260 Mallick S, Rohland N, Patterson N, Mwenje MA, Ahmed KB, Mohamed MM, Williams SR, Monge

- 1261 J, Kusimba S, Prendergast ME, Reich D, Kusimba CM. Entwined African and Asian genetic roots  
1262 of medieval peoples of the Swahili coast. *Nature*. **615** (2023) 866–873. doi: 10.1038/s41586-023-  
1263 05754-w.
- 1264 7. Carlhoff S, Duli A, Nägele K, Nur M, Skov L, Sumantri I, Oktaviana AA, Hakim B, Burhan B,  
1265 Syahdar FA, McGahan DP, Bulbeck D, Perston YL, Newman K, Saiful AM, Ririmasse M, Chia S,  
1266 Hasanuddin, Pulubuhu DAT, Suryatman, Supriadi, Jeong C, Peter BM, Prüfer K, Powell A, Krause  
1267 J, Posth C, Brumm A. Genome of a middle Holocene hunter-gatherer from Wallacea. *Nature*. **596**  
1268 (2021) 543–547. doi: 10.1038/s41586-021-03823-6.
- 1269 8. Chang CC, Chow CC, Tellier LC, Vattikuti S, Purcell SM, Lee JJ. Second-generation PLINK: rising to  
1270 the challenge of larger and richer datasets, *Gigascience*. **4** (2015) 7. doi: 10.1186/s13742-015-  
1271 0047-8.
- 1272 9. Changmai P, Jaisamut K, Kampuansai J, Kutanan W, Altınışık NE, Flegontova O, Inta A, Yüncü E,  
1273 Boonthai W, Pamjav H, Reich D, Flegontov P. Indian genetic heritage in Southeast Asian  
1274 populations, *PLoS Genet*. **18** (2022a) e1010036. doi: 10.1371/journal.pgen.1010036.
- 1275 10. Changmai P, Pinhasi R, Pietrusewsky M, Stark MT, Ikehara-Quebral RM, Reich D, Flegontov P.  
1276 Ancient DNA from Protohistoric Period Cambodia indicates that South Asians admixed with local  
1277 populations as early as 1st-3rd centuries CE, *Sci. Rep*. **12** (2022b) 22507. doi: 10.1038/s41598-  
1278 022-26799-3.
- 1279 11. Chintalapati M, Patterson N, Moorjani P. The spatiotemporal patterns of major human  
1280 admixture events during the European Holocene, *eLife*. **11** (2022) e77625. doi:  
1281 10.7554/eLife.77625.
- 1282 12. de Barros Damgaard P, Martiniano R, Kamm J, Moreno-Mayar JV, Kroonen G, Peyrot M,  
1283 Barjamovic G, Rasmussen S, Zacho C, Baimukhanov N, Zaibert V, Merz V, Biddanda A, Merz I,  
1284 Loman V, Evdokimov V, Usmanova E, Hemphill B, Seguin-Orlando A, Yediay FE, Ullah I, Sjögren  
1285 KG, Iversen KH, Choin J, de la Fuente C, Ilardo M, Schroeder H, Moiseyev V, Gromov A, Polyakov  
1286 A, Omura S, Senyurt SY, Ahmad H, McKenzie C, Margaryan A, Hameed A, Samad A, Gul N,  
1287 Khokhar MH, Goriunova OI, Bazaliiskii VI, Novembre J, Weber AW, Orlando L, Allentoft ME,  
1288 Nielsen R, Kristiansen K, Sikora M, Outram AK, Durbin R, Willerslev E. The first horse herders and  
1289 the impact of early Bronze Age steppe expansions into Asia, *Science*. **360** (2018) eaar7711. doi:  
1290 10.1126/science.aar7711.
- 1291 13. Durand EY, Patterson N, Reich D, Slatkin M. Testing for ancient admixture between closely  
1292 related populations, *Mol. Biol. Evol*. **28** (2011) 2239–2252. doi: 10.1093/molbev/msr048.
- 1293 14. Fernandes DM, Mittnik A, Olalde I, Lazaridis I, Cheronet O, Rohland N, Mallick S, Bernardos R,  
1294 Broomandkoshbacht N, Carlsson J, Culleton BJ, Ferry M, Gamarra B, Lari M, Mah M, Michel M,

- 1295 Modi A, Novak M, Oppenheimer J, Sirak KA, Stewardson K, Mandl K, Schattke C, Özdoğan KT,  
1296 Lucci M, Gasperetti G, Candilio F, Salis G, Vai S, Camarós E, Calò C, Catalano G, Cueto M, Forgia  
1297 V, Lozano M, Marini E, Micheletti M, Micciché RM, Palombo MR, Ramis D, Schimmenti V, Sureda  
1298 P, Teira L, Teschler-Nicola M, Kennett DJ, Lalueza-Fox C, Patterson N, Sineo L, Coppa A, Caramelli  
1299 D, Pinhasi R, Reich D. The spread of steppe and Iranian-related ancestry in the islands of the  
1300 western Mediterranean, *Nat. Ecol. Evol.* **4** (2020) 334–345. doi: 10.1038/s41559-020-1102-0.
- 1301 15. Fernandes DM, Sirak KA, Ringbauer H, Sedig J, Rohland N, Cheronet O, Mah M, Mallick S, Olalde  
1302 I, Culleton BJ, Adamski N, Bernardos R, Bravo G, Broomandkhoshbacht N, Callan K, Candilio F,  
1303 Demetz L, Carlson KSD, Eccles L, Freilich S, George RJ, Lawson AM, Mandl K, Marzaioli F, McCool  
1304 WC, Oppenheimer J, Özdoğan KT, Schattke C, Schmidt R, Stewardson K, Terrasi F, Zalzalá F,  
1305 Antúnez CA, Canosa EV, Colten R, Cucina A, Genchi F, Kraan C, La Pastina F, Lucci M, Maggiolo  
1306 MV, Marcheco-Teruel B, Maria CT, Martínez C, París I, Pateman M, Simms TM, Sivoli CG, Vilar M,  
1307 Kennett DJ, Keegan WF, Coppa A, Lipson M, Pinhasi R, Reich D. A genetic history of the pre-  
1308 contact Caribbean, *Nature*. **590** (2021) 103–110. doi: 10.1038/s41586-020-03053-2.
- 1309 16. Frichot E, Schoville S, Bouchard G, François O. Correcting principal component maps for effects  
1310 of spatial autocorrelation in population genetic data, *Front. Genet.* **3** (2012) 254. doi:  
1311 10.3389/fgene.2012.00254.
- 1312 17. Furtwängler A, Rohrlach AB, Lamnidis TC, Papac L, Neumann GU, Siebke I, Reiter E, Steuri N,  
1313 Hald J, Denaire A, Schnitzler B, Wahl J, Ramstein M, Schuenemann VJ, Stockhammer PW, Hafner  
1314 A, Lössch S, Haak W, Schiffels S, Krause J. Ancient genomes reveal social and genetic structure of  
1315 Late Neolithic Switzerland. *Nat. Commun.* **11** (2020) 1915. doi: 10.1038/s41467-020-15560-x.
- 1316 18. Green RE, Krause J, Briggs AW, Maricic T, Stenzel U, Kircher M, Patterson N, Li H, Zhai W, Fritz  
1317 MH, Hansen NF, Durand EY, Malaspinas AS, Jensen JD, Marques-Bonet T, Alkan C, Prüfer K,  
1318 Meyer M, Burbano HA, Good JM, Schultz R, Aximu-Petri A, Butthof A, Höber B, Höffner B,  
1319 Siegemund M, Weihmann A, Nusbaum C, Lander ES, Russ C, Novod N, Affourtit J, Egholm M,  
1320 Verna C, Rudan P, Brajkovic D, Kucan Ž, Gušić I, Doronichev VB, Golovanova LV, Lalueza-Fox C,  
1321 de la Rasilla M, Fortea J, Rosas A, Schmitz RW, Johnson PLF, Eichler EE, Falush D, Birney E,  
1322 Mullikin JC, Slatkin M, Nielsen R, Kelso J, Lachmann M, Reich D, Pääbo S. A draft sequence of the  
1323 Neandertal genome, *Science*. **328** (2010) 710–722. doi: 10.1126/science.1188021.
- 1324 19. Gneccchi-Ruscione GA, Szécsényi-Nagy A, Koncz I, Csiky G, Rácz Z, Rohrlach AB, Brandt G, Rohland  
1325 N, Csáky V, Cheronet O, Szeifert B, Rácz TÁ, Benedek A, Bernert Z, Berta N, Czifra S, Dani J,  
1326 Farkas Z, Hága T, Hajdu T, Jászberényi M, Kisjuhász V, Kolozsi B, Major P, Marcsik A, Kovacsóczy  
1327 BN, Balogh C, Lezsák GM, Ódor JG, Szelekovszky M, Szeniczey T, Tárnoki J, Tóth Z, Tutkovics EK,  
1328 Mende BG, Geary P, Pohl W, Vida T, Pinhasi R, Reich D, Hofmanová Z, Jeong C, Krause J. Ancient

- 1329 genomes reveal origin and rapid trans-Eurasian migration of 7th century Avar elites, *Cell*. **185**  
1330 (2022) 1402–1413.e21. doi: 10.1016/j.cell.2022.03.007.
- 1331 20. Haak W, Lazaridis I, Patterson N, Rohland N, Mallick S, Llamas B, Brandt G, Nordenfelt S, Harney  
1332 E, Stewardson K, Fu Q, Mittnik A, Bánffy E, Economou C, Francken M, Friederich S, Pena RG,  
1333 Hallgren F, Khartanovich V, Khokhlov A, Kunst M, Kuznetsov P, Meller H, Mochalov O, Moiseyev  
1334 V, Nicklisch N, Pichler SL, Risch R, Rojo Guerra MA, Roth C, Szécsényi-Nagy A, Wahl J, Meyer M,  
1335 Krause J, Brown D, Anthony D, Cooper A, Alt KW, Reich D. Massive migration from the steppe  
1336 was a source for Indo-European languages in Europe, *Nature*. **522** (2015) 207–211. doi:  
1337 10.1038/nature14317.
- 1338 21. Harney É, May H, Shalem D, Rohland N, Mallick S, Lazaridis I, Sarig R, Stewardson K, Nordenfelt  
1339 S, Patterson N, Hershkovitz I, Reich D. Ancient DNA from Chalcolithic Israel reveals the role of  
1340 population mixture in cultural transformation, *Nat. Commun.* **9** (2018) 3336. doi:  
1341 10.1038/s41467-018-05649-9.
- 1342 22. Harney É, Nayak A, Patterson N, Joglekar P, Mushrif-Tripathy V, Mallick S, Rohland N, Sedig J,  
1343 Adamski N, Bernardos R, Broomandkhoshbacht N, Culleton BJ, Ferry M, Harper TK, Michel M,  
1344 Oppenheimer J, Stewardson K, Zhang Z, Harashawaradhana, Bartwal MS, Kumar S, Diyundi SC,  
1345 Roberts P, Boivin N, Kennett DJ, Thangaraj K, Reich D, Rai N. Ancient DNA from the skeletons of  
1346 Roopkund Lake reveals Mediterranean migrants in India, *Nat. Commun.* **10** (2019) 3670. doi:  
1347 10.1038/s41467-019-11357-9.
- 1348 23. Harney É, Patterson N, Reich D, Wakeley J. Assessing the performance of qpAdm: a statistical  
1349 tool for studying population admixture, *Genetics*. **217** (2021) iyaa045. doi:  
1350 10.1093/GENETICS/IYAA045.
- 1351 24. Jeong C, Balanovsky O, Lukianova E, Kahbatkyzy N, Flegontov P, Zaporozhchenko V, Immel A,  
1352 Wang CC, Ixan O, Khussainova E, Bekmanov B, Zaibert V, Lavryashina M, Pocheshkhova E,  
1353 Yusupov Y, Agdzhoyan A, Koshel S, Bukin A, Nymadawa P, Turdikulova S, Dalimova D, Churnosov  
1354 M, Skhalyakho R, Daragan D, Bogunov Y, Bogunova A, Shtrunov A, Dubova N, Zhabagin M,  
1355 Yepiskoposyan L, Churakov V, Pislegin N, Damba L, Saroyants L, Dibirova K, Atramentova L,  
1356 Utevska O, Idrisov E, Kamenshchikova E, Evseeva I, Metspalu M, Outram AK, Robbeets M,  
1357 Djansugurova L, Balanovska E, Schiffels S, Haak W, Reich D, Krause J. The genetic history of  
1358 admixture across inner Eurasia, *Nat. Ecol. Evol.* **3** (2019) 966–976. doi: 10.1038/s41559-019-  
1359 0878-2.
- 1360 25. Lawson DJ, van Dorp L, Falush D. A tutorial on how not to over-interpret STRUCTURE and  
1361 ADMIXTURE bar plots, *Nat Commun.* **9** (2018) 3258. doi: 10.1038/s41467-018-05257-7.
- 1362 26. Lazaridis I, Nadel D, Rollefson G, Merrett DC, Rohland N, Mallick S, Fernandes D, Novak M,

- 1363 Gamarra B, Sirak K, Connell S, Stewardson K, Harney E, Fu Q, Gonzalez-Fortes G, Jones ER,  
1364 Roodenberg SA, Lengyel G, Bocquentin F, Gasparian B, Monge JM, Gregg M, Eshed V, Mizrahi  
1365 AS, Meiklejohn C, Gerritsen F, Bejenaru L, Blüher M, Campbell A, Cavalleri G, Comas D, Froguel  
1366 P, Gilbert E, Kerr SM, Kovacs P, Krause J, McGettigan D, Merrigan M, Merriwether DA, O'Reilly S,  
1367 Richards MB, Semino O, Shamoony-Pour M, Stefanescu G, Stumvoll M, Tönjes A, Torroni A,  
1368 Wilson JF, Yengo L, Hovhannisyan NA, Patterson N, Pinhasi R, Reich D. Genomic insights into the  
1369 origin of farming in the ancient Near East, *Nature*. **536** (2016) 419–424. doi:  
1370 10.1038/nature19310.
- 1371 27. Lazaridis I, Mittnik A, Patterson N, Mallick S, Rohland N, Pfrengle S, Furtwängler A, Peltzer A,  
1372 Posth C, Vasilakis A, McGeorge PJP, Konsolaki-Yannopoulou E, Korres G, Martlew H,  
1373 Michalodimitrakis M, Özsait M, Özsait N, Papathanasiou A, Richards M, Roodenberg SA, Tzedakis  
1374 Y, Arnott R, Fernandes DM, Hughey JR, Lotakis DM, Navas PA, Maniatis Y, Stamatoyannopoulos  
1375 JA, Stewardson K, Stockhammer P, Pinhasi R, Reich D, Krause J, Stamatoyannopoulos G. Genetic  
1376 origins of the Minoans and Mycenaeans, *Nature*. **548** (2017) 214–218. doi:  
1377 10.1038/nature23310.
- 1378 28. Lazaridis I, Alpaslan-Roodenberg S, Acar A, Açikkol A, Agelarakis A, Aghikyan L, Akyüz U,  
1379 Andreeva D, Andrijašević G, Antonović D, Armit I, Atmaca A, Avetisyan P, Aytek Aİ, Bacvarov K,  
1380 Badalyan R, Bakardzhiev S, Balen J, Bejko L, Bernardos R, Bertsatos A, Biber H, Bilir A, Bodružić  
1381 M, Bonogofsky M, Bonsall C, Borić D, Borovinić N, Bravo Morante G, Buttinger K, Callan K,  
1382 Candilio F, Carić M, Cheronet O, Chohadzhiev S, Chovalopoulou ME, Chrissyoulaki S, Ciobanu I,  
1383 Čondić N, Constantinescu M, Cristiani E, Culleton BJ, Curtis E, Davis J, Demcenco TI, Dergachev V,  
1384 Derin Z, Deskaj S, Devejian S, Djordjević V, Duffett Carlson KS, Eccles LR, Elenski N, Engin A,  
1385 Erdoğan N, Erir-Pazarci S, Fernandes DM, Ferry M, Freilich S, Frînculeasa A, Galaty ML, Gamarra  
1386 B, Gasparyan B, Gaydarska B, Genç E, Gültekin T, Gündüz S, Hajdu T, Heyd V, Hobosyan S,  
1387 Hovhannisyan N, Iliev I, Iliev L, Iliev S, İvgin İ, Janković I, Jovanova L, Karkanis P, Kavaz-Kındıgılı B,  
1388 Kaya EH, Keating D, Kennett DJ, Deniz Kesici S, Khudaverdyan A, Kiss K, Kılıç S, Klostermann P,  
1389 Kostak Boca Negra Valdes S, Kovačević S, Krenz-Niedbała M, Krznarić Škrivanko M, Kurti R,  
1390 Kuzman P, Lawson AM, Lazar C, Leshtakov K, Levy TE, Liritzis I, Lorentz KO, Łukasik S, Mah M,  
1391 Mallick S, Mandl K, Martirosyan-Olshansky K, Matthews R, Matthews W, McSweeney K,  
1392 Melikyan V, Micco A, Michel M, Milašinović L, Mittnik A, Monge JM, Nekhrizov G, Nicholls R,  
1393 Nikitin AG, Nikolov V, Novak M, Olalde I, Oppenheimer J, Osterholtz A, Özdemir C, Özdoğan KT,  
1394 Öztürk N, Papadimitriou N, Papakonstantinou N, Papathanasiou A, Paraman L, Paskary EG,  
1395 Patterson N, Petrakiev I, Petrosyan L, Petrova V, Philippa-Touchais A, Piliposyan A, Pocuca  
1396 Kuzman N, Potrelica H, Preda-Bălănică B, Premužić Z, Price TD, Qiu L, Radović S, Raeuf Aziz K,

- 1397 Rajić Šikanjić P, Rasheed Raheem K, Razumov S, Richardson A, Roodenberg J, Ruka R, Russeva V,  
1398 Şahin M, Şarbak A, Savaş E, Schattke C, Schepartz L, Selçuk T, Sevim-Erol A, Shamoony-Pour M,  
1399 Shephard HM, Sideris A, Simalcsik A, Simonyan H, Sinika V, Sirak K, Sirbu G, Šlaus M, Soficaru A,  
1400 Söğüt B, Sołtysiak A, Sönmez-Sözer Ç, Stathi M, Steskal M, Stewardson K, Stocker S, Suata-  
1401 Alpaslan F, Suvorov A, Szécsényi-Nagy A, Szeniczey T, Telnov N, Temov S, Todorova N, Tota U,  
1402 Touchais G, Triantaphyllou S, Türker A, Ugarković M, Valchev T, Veljanovska F, Videvski Z, Virag  
1403 C, Wagner A, Walsh S, Włodarczyk P, Workman JN, Yardumian A, Yarovoy E, Yavuz AY, Yılmaz H,  
1404 Zalzal F, Zettl A, Zhang Z, Çavuşoğlu R, Rohland N, Pinhasi R, Reich D, Davtyan R. The genetic  
1405 history of the Southern Arc: A bridge between West Asia and Europe, *Science*. **377** (2022)  
1406 eabm4247. doi: 10.1126/science.abm4247.
- 1407 29. Lee J, Miller BK, Bayarsaikhan J, Johannesson E, Ventresca Miller A, Warinner C, Jeong C. Genetic  
1408 population structure of the Xiongnu Empire at imperial and local scales. *Sci. Adv.* **9** (2023)  
1409 eadf3904. doi: 10.1126/sciadv.adf3904.
- 1410 30. Librado P, Khan N, Fages A, Kusliy MA, Suchan T, Tonasso-Calvière L, Schiavinato S, Alioglu D,  
1411 Fromentier A, Perdereau A, Aury JM, Gaunitz C, Chauvey L, Seguin-Orlando A, Der Sarkissian C,  
1412 Southon J, Shapiro B, Tishkin AA, Kovalev AA, Alquraishi S, Alfarhan AH, Al-Rasheid KAS, Seregély  
1413 T, Klassen L, Iversen R, Bignon-Lau O, Bodu P, Olive M, Castel JC, Boudadi-Maligne M, Alvarez N,  
1414 Germonpré M, Moskal-Del Hoyo M, Wilczyński J, Pospuła S, Lasota-Kuś A, Tunia K, Nowak M,  
1415 Rannamäe E, Saarma U, Boeskorov G, Lõugas L, Kyselý R, Peške L, Bălăşescu A, Dumitraşcu V,  
1416 Dobrescu R, Gerber D, Kiss V, Szécsényi-Nagy A, Mende BG, Gallina Z, Somogyi K, Kulcsár G, Gál  
1417 E, Bendrey R, Allentoft ME, Sirbu G, Dergachev V, Shephard H, Tomadini N, Grouard S, Kasparov  
1418 A, Basilyan AE, Anisimov MA, Nikolskiy PA, Pavlova EY, Pitulko V, Brem G, Wallner B, Schwall C,  
1419 Keller M, Kitagawa K, Bessudnov AN, Bessudnov A, Taylor W, Magail J, Gantulga JO,  
1420 Bayarsaikhan J, Erdenebaatar D, Tabaldiev K, Mijiddorj E, Boldgiv B, Tsagaan T, Pruvost M, Olsen  
1421 S, Makarewicz CA, Valenzuela Lamas S, Albizuri Canadell S, Nieto Espinet A, Iborra MP, Lira  
1422 Garrido J, Rodríguez González E, Celestino S, Olària C, Arsuaga JL, Kotova N, Pryor A, Crabtree P,  
1423 Zhumatayev R, Toleubaev A, Morgunova NL, Kuznetsova T, Lordkipanize D, Marzullo M, Prato O,  
1424 Bagnasco Gianni G, Tecchiati U, Clavel B, Lepetz S, Davoudi H, Mashkour M, Berezina NY,  
1425 Stockhammer PW, Krause J, Haak W, Morales-Muñiz A, Benecke N, Hofreiter M, Ludwig A,  
1426 Graphodatsky AS, Peters J, Kiryushin KY, Iderkhangai TO, Bokovenko NA, Vasiliev SK, Seregin NN,  
1427 Chugunov KV, Plasteeva NA, Baryshnikov GF, Petrova E, Sablin M, Ananyevskaya E, Logvin A,  
1428 Shevnina I, Logvin V, Kalieva S, Loman V, Kukushkin I, Merz I, Merz V, Sakenov S, Varfolomeyev  
1429 V, Usmanova E, Zaibert V, Arbuckle B, Belinskiy AB, Kalmykov A, Reinhold S, Hansen S, Yudin AI,  
1430 Vybornov AA, Epimakhov A, Berezina NS, Roslyakova N, Kosintsev PA, Kuznetsov PF, Anthony D,



- 1431 Kroonen GJ, Kristiansen K, Wincker P, Outram A, Orlando L. The origins and spread of domestic  
1432 horses from the Western Eurasian steppes, *Nature*. **598** (2021) 634–640. doi: 10.1038/s41586-  
1433 021-04018-9.
- 1434 31. Lipson M. Applying  $f_4$ -statistics and admixture graphs: Theory and examples, *Mol. Ecol. Resour.*  
1435 **20** (2020) 1658–1667. doi: 10.1111/1755-0998.13230.
- 1436 32. Loh PR, Lipson M, Patterson N, Moorjani P, Pickrell JK, Reich D, Berger B. Inferring admixture  
1437 histories of human populations using linkage disequilibrium, *Genetics*. **193** (2013) 1233–1254.  
1438 doi: 10.1534/genetics.112.147330.
- 1439 33. Maier R, Flegontov P, Flegontova O, İşıldak U, Changmai P, Reich D. On the limits of fitting  
1440 complex models of population history to  $f$ -statistics. *eLife*. **12** (2023) e85492. doi:  
1441 10.7554/eLife.85492.
- 1442 34. Maróti Z, Neparáczki E, Schütz O, Maár K, Varga GIB, Kovács B, Kalmár T, Nyerki E, Nagy I,  
1443 Latinovics D, Tihanyi B, Marcsik A, Pálfi G, Bernert Z, Gallina Z, Horváth C, Varga S, Költő L, Raskó  
1444 I, Nagy PL, Balogh C, Zink A, Maixner F, Götherström A, George R, Szalontai C, Szenthe G, Gáll E,  
1445 Kiss AP, Gulyás B, Kovacsóczy BN, Gál SS, Tomka P, Török T. The genetic origin of Huns, Avars,  
1446 and conquering Hungarians, *Curr. Biol.* **32** (2022) 2858–2870.e7. doi: 10.1016/j.cub.2022.04.093.
- 1447 35. Martin SH, Davey JW, Jiggins CD. Evaluating the use of ABBA-BABA statistics to locate  
1448 introgressed loci, *Mol. Biol. Evol.* **32** (2014) 244–257. doi: 10.1093/molbev/msu269.
- 1449 36. Marcus JH, Posth C, Ringbauer H, Lai L, Skeates R, Sidore C, Beckett J, Furtwängler A, Olivieri A,  
1450 Chiang CWK, Al-Asadi H, Dey K, Joseph TA, Liu CC, Der Sarkissian C, Radzevičiūtė R, Michel M,  
1451 Gradoli MG, Marongiu P, Rubino S, Mazzarello V, Rovina D, La Fragola A, Serra RM, Bandiera P,  
1452 Bianucci R, Pompianu E, Murgia C, Guirguis M, Orquin RP, Tuross N, van Dommelen P, Haak W,  
1453 Reich D, Schlessinger D, Cucca F, Krause J, Novembre J. Genetic history from the Middle  
1454 Neolithic to present on the Mediterranean island of Sardinia, *Nat. Commun.* **11** (2020) 939. doi:  
1455 10.1038/s41467-020-14523-6.
- 1456 37. Maróti Z, Neparáczki E, Schütz O, Maár K, Varga GIB, Kovács B, Kalmár T, Nyerki E, Nagy I,  
1457 Latinovics D, Tihanyi B, Marcsik A, Pálfi G, Bernert Z, Gallina Z, Horváth C, Varga S, Költő L, Raskó  
1458 I, Nagy PL, Balogh C, Zink A, Maixner F, Götherström A, George R, Szalontai C, Szenthe G, Gáll E,  
1459 Kiss AP, Gulyás B, Kovacsóczy BN, Gál SS, Tomka P, Török T. The genetic origin of Huns, Avars,  
1460 and conquering Hungarians, *Curr. Biol.* **32** (2022) 2858–2870.e7. doi: 10.1016/j.cub.2022.04.093.
- 1461 38. Mathieson I, Lazaridis I, Rohland N, Mallick S, Patterson N, Roodenberg SA, Harney E,  
1462 Stewardson K, Fernandes D, Novak M, Sirak K, Gamba C, Jones ER, Llamas B, Dryomov S, Pickrell  
1463 J, Arsuaga JL, de Castro JM, Carbonell E, Gerritsen F, Khokhlov A, Kuznetsov P, Lozano M, Meller  
1464 H, Mochalov O, Moiseyev V, Guerra MA, Roodenberg J, Vergès JM, Krause J, Cooper A, Alt KW,



- 1465 Brown D, Anthony D, Lalueza-Fox C, Haak W, Pinhasi R, Reich D. Genome-wide patterns of  
1466 selection in 230 ancient Eurasians, *Nature*. **528** (2015) 499–503. doi: 10.1038/nature16152.  
1467 Epub 2015 Nov 23. PMID: 26595274; PMCID: PMC4918750.
- 1468 39. Mathieson I, Alpaslan-Roodenberg S, Posth C, Szécsényi-Nagy A, Rohland N, Mallick S, Olalde I,  
1469 Broomandkoshbacht N, Candilio F, Cheronet O, Fernandes D, Ferry M, Gamarra B, Fortes GG,  
1470 Haak W, Harney E, Jones E, Keating D, Krause-Kyora B, Kucukkalipci I, Michel M, Mittnik A,  
1471 Nägele K, Novak M, Oppenheimer J, Patterson N, Pfrengle S, Sirak K, Stewardson K, Vai S,  
1472 Alexandrov S, Alt KW, Andreescu R, Antonović D, Ash A, Atanassova N, Bacvarov K, Gusztáv MB,  
1473 Bocherens H, Bolus M, Boroneanț A, Boyadzhiev Y, Budnik A, Burmaz J, Chohadzhiev S, Conard  
1474 NJ, Cottiaux R, Čuka M, Cupillard C, Drucker DG, Elenski N, Francken M, Galabova B, Ganetsovski  
1475 G, Gély B, Hajdu T, Handzhyiska V, Harvati K, Higham T, Iliev S, Janković I, Karavanić I, Kennett  
1476 DJ, Komšo D, Kozak A, Labuda D, Lari M, Lazar C, Leppek M, Leshtakov K, Vetro DL, Los D,  
1477 Lozanov I, Malina M, Martini F, McSweeney K, Meller H, Menđušić M, Mirea P, Moiseyev V,  
1478 Petrova V, Price TD, Simalcsik A, Sineo L, Šlaus M, Slavchev V, Stanev P, Starović A, Szeniczey T,  
1479 Talamo S, Teschler-Nicola M, Thevenet C, Valchev I, Valentin F, Vasilyev S, Veljanovska F,  
1480 Venelinova S, Veselovskaya E, Viola B, Virag C, Zaninović J, Zäuner S, Stockhammer PW, Catalano  
1481 G, Krauß R, Caramelli D, Zariņa G, Gaydarska B, Lillie M, Nikitin AG, Potekhina I, Papathanasiou  
1482 A, Borić D, Bonsall C, Krause J, Pinhasi R, Reich D. The genomic history of southeastern Europe,  
1483 *Nature*. **555** (2018) 197–203. doi: 10.1038/nature25778.
- 1484 40. McVean G. A genealogical interpretation of principal components analysis, *PLoS Genet*. **5** (2009)  
1485 e1000686. doi: 10.1371/journal.pgen.1000686.
- 1486 41. Moreno-Mayar JV, Potter BA, Vinner L, Steinrücken M, Rasmussen S, Terhorst J, Kamm JA,  
1487 Albrechtsen A, Malaspinas AS, Sikora M, Reuther JD, Irish JD, Malhi RS, Orlando L, Song YS,  
1488 Nielsen R, Meltzer DJ, Willerslev E. Terminal Pleistocene Alaskan genome reveals first founding  
1489 population of Native Americans. *Nature*. **553** (2018a) 203–207. doi: 10.1038/nature25173.
- 1490 42. Moreno-Mayar JV, Vinner L, de Barros Damgaard P, de la Fuente C, Chan J, Spence JP, Allentoft  
1491 ME, Vimala T, Racimo F, Pinotti T, Rasmussen S, Margaryan A, Iraeta Orbegozo M,  
1492 Mylopotamitaki D, Wooller M, Bataille C, Becerra-Valdivia L, Chivall D, Comeskey D, Devièse T,  
1493 Grayson DK, George L, Harry H, Alexandersen V, Primeau C, Erlandson J, Rodrigues-Carvalho C,  
1494 Reis S, Bastos MQR, Cybulski J, Vullo C, Morello F, Vilar M, Wells S, Gregersen K, Hansen KL,  
1495 Lynnerup N, Mirazón Lahr M, Kjær K, Strauss A, Alfonso-Durruty M, Salas A, Schroeder H,  
1496 Higham T, Malhi RS, Rasic JT, Souza L, Santos FR, Malaspinas AS, Sikora M, Nielsen R, Song YS,  
1497 Meltzer DJ, Willerslev E. Early human dispersals within the Americas, *Science*. **362** (2018b)  
1498 eaav2621. doi: 10.1126/science.aav2621.

- 1499 43. Narasimhan VM, Patterson N, Moorjani P, Rohland N, Bernardos R, Mallick S, Lazaridis I,  
1500 Nakatsuka N, Olalde I, Lipson M, Kim AM, Olivieri LM, Coppa A, Vidale M, Mallory J, Moiseyev V,  
1501 Kitov E, Monge J, Adamski N, Alex N, Broomandkhoshbacht N, Candilio F, Callan K, Cheronet O,  
1502 Culleton BJ, Ferry M, Fernandes D, Freilich S, Gamarra B, Gaudio D, Hajdinjak M, Harney É,  
1503 Harper TK, Keating D, Lawson AM, Mah M, Mandl K, Michel M, Novak M, Oppenheimer J, Rai N,  
1504 Sirak K, Slon V, Stewardson K, Zalzal F, Zhang Z, Akhatov G, Bagashev AN, Bagnera A,  
1505 Baitanayev B, Bendezu-Sarmiento J, Bissembaev AA, Bonora GL, Charyginov TT, Chikisheva T,  
1506 Dashkovskiy PK, Derevianko A, Dobeš M, Douka K, Dubova N, Duisengali MN, Enshin D,  
1507 Epimakhov A, Fribus AV, Fuller D, Goryachev A, Gromov A, Grushin SP, Hanks B, Judd M, Kazizov  
1508 E, Khokhlov A, Krygin AP, Kupriyanova E, Kuznetsov P, Luiselli D, Maksudov F, Mamedov AM,  
1509 Mamirov TB, Meiklejohn C, Merrett DC, Micheli R, Mochalov O, Mustafokulov S, Nayak A,  
1510 Pettener D, Potts R, Razhev D, Rykun M, Sarno S, Savenkova TM, Sikhymbaeva K, Slepchenko  
1511 SM, Soltobaev OA, Stepanova N, Svyatko S, Tabaldiev K, Teschler-Nicola M, Tishkin AA, Tkachev  
1512 VV, Vasilyev S, Velemínský P, Voyakin D, Yermolayeva A, Zahir M, Zubkov VS, Zubova A, Shinde  
1513 VS, Lalueza-Fox C, Meyer M, Anthony D, Boivin N, Thangaraj K, Kennett DJ, Frachetti M, Pinhasi  
1514 R, Reich D. The formation of human populations in South and Central Asia, *Science*. **365** (2019)  
1515 eaat7487. doi: 10.1126/science.aat7487.
- 1516 44. Nelson D, Kelleher J, Ragsdale AP, Moreau C, McVean G, Gravel S. Accounting for long-range  
1517 correlations in genome-wide simulations of large cohorts, *PLoS Genet*. **16** (2020) e1008619. doi:  
1518 10.1371/journal.pgen.1008619.
- 1519 45. Ning C, Li T, Wang K, Zhang F, Li T, Wu X, Gao S, Zhang Q, Zhang H, Hudson MJ, Dong G, Wu S,  
1520 Fang Y, Liu C, Feng C, Li W, Han T, Li R, Wei J, Zhu Y, Zhou Y, Wang CC, Fan S, Xiong Z, Sun Z, Ye  
1521 M, Sun L, Wu X, Liang F, Cao Y, Wei X, Zhu H, Zhou H, Krause J, Robbeets M, Jeong C, Cui Y.  
1522 Ancient genomes from northern China suggest links between subsistence changes and human  
1523 migration, *Nat. Commun*. **11** (2020) 2700. doi: 10.1038/s41467-020-16557-2.
- 1524 46. Ning C, Fernandes D, Changmai P, Flegontova O, Yüncü E, Maier R, Altınışık NE, Kassian AS,  
1525 Krause J., Lalueza-Fox C, Manica A, Potter BA, Robbeets M, Sirak K, Siska V, Vajda EJ, Vyazov LA,  
1526 Wang K, Wang L, Wu X, Xiao X, Zhang F, Reich D, Schiffels S, Pinhasi R, Cui Y, Flegontov P. The  
1527 genomic formation of First American ancestors in East and Northeast Asia, *bioRxiv*. (2020). doi:  
1528 10.1101/2020.10.12.336628.
- 1529 47. Novembre J, Stephens M. Interpreting principal component analyses of spatial population  
1530 genetic variation, *Nat. Genet*. **40** (2008) 646–649. doi: 10.1038/ng.139.
- 1531 48. Olalde I, Mallick S, Patterson N, Rohland N, Villalba-Mouco V, Silva M, Duliás K, Edwards CJ,  
1532 Gandini F, Pala M, Soares P, Ferrando-Bernal M, Adamski N, Broomandkhoshbacht N, Cheronet

- 1533 O, Culleton BJ, Fernandes D, Lawson AM, Mah M, Oppenheimer J, Stewardson K, Zhang Z,  
1534 Jiménez Arenas JM, Toro Moyano IJ, Salazar-García DC, Castanyer P, Santos M, Tremeleda J,  
1535 Lozano M, García Borja P, Fernández-Eraso J, Mujika-Alustiza JA, Barroso C, Bermúdez FJ,  
1536 Viguera Mínguez E, Burch J, Coromina N, Vivó D, Cebrià A, Fullola JM, García-Puchol O, Morales  
1537 JI, Oms FX, Majó T, Vergès JM, Díaz-Carvajal A, Ollich-Castanyer I, López-Cachero FJ, Silva AM,  
1538 Alonso-Fernández C, Delibes de Castro G, Jiménez Echevarría J, Moreno-Márquez A, Pascual  
1539 Berlanga G, Ramos-García P, Ramos-Muñoz J, Vijande Vila E, Aguilera Arzo G, Esparza Arroyo Á,  
1540 Lillios KT, Mack J, Velasco-Vázquez J, Waterman A, Benítez de Lugo Enrich L, Benito Sánchez M,  
1541 Agustí B, Codina F, de Prado G, Estalrich A, Fernández Flores Á, Finlayson C, Finlayson G,  
1542 Finlayson S, Giles-Guzmán F, Rosas A, Barciela González V, García Atiénzar G, Hernández Pérez  
1543 MS, Llanos A, Carrión Marco Y, Collado Beneyto I, López-Serrano D, Sanz Tormo M, Valera AC,  
1544 Blasco C, Liesau C, Ríos P, Daura J, de Pedro Michó MJ, Díez-Castillo AA, Flores Fernández R,  
1545 Francès Farré J, Garrido-Pena R, Gonçalves VS, Guerra-Doce E, Herrero-Corral AM, Juan-  
1546 Cabanilles J, López-Reyes D, McClure SB, Merino Pérez M, Oliver Foix A, Sanz Borràs M, Sousa  
1547 AC, Vidal Encinas JM, Kennett DJ, Richards MB, Werner Alt K, Haak W, Pinhasi R, Lalueza-Fox C,  
1548 Reich D. The genomic history of the Iberian Peninsula over the past 8000 years, *Science*. **363**  
1549 (2019) 1230–1234. doi: 10.1126/science.aav4040.
- 1550 49. Oliveira S, Nägele K, Carlhoff S, Pugach I, Koesbardiati T, Hübner A, Meyer M, Oktaviana AA,  
1551 Takenaka M, Katagiri C, Murti DB, Putri RS, Mahirta, Petchey F, Higham T, Higham CFW,  
1552 O'Connor S, Hawkins S, Kinaston R, Bellwood P, Ono R, Powell A, Krause J, Posth C, Stoneking M.  
1553 Ancient genomes from the last three millennia support multiple human dispersals into Wallacea.  
1554 *Nat. Ecol. Evol.* **6** (2022) 1024–1034. doi: 10.1038/s41559-022-01775-2.
- 1555 50. Papac L, Ernée M, Dobeš M, Langová M, Rohrlach AB, Aron F, Neumann GU, Spyrou MA,  
1556 Rohland N, Velemínský P, Kuna M, Brzobohatá H, Culleton B, Daněček D, Danielisová A,  
1557 Dobisíková M, Hložek J, Kennett DJ, Klementová J, Kostka M, Krištuf P, Kuchařík M, Hlavová JK,  
1558 Limburský P, Malyková D, Mattiello L, Pecinová M, Petriščíková K, Průchová E, Stránská P,  
1559 Smejtek L, Špaček J, Šumberová R, Švejcar O, Trefný M, Vávra M, Kolář J, Heyd V, Krause J,  
1560 Pinhasi R, Reich D, Schiffels S, Haak W. Dynamic changes in genomic and social structures in  
1561 third millennium BCE central Europe, *Sci. Adv.* **7** (2021) eabi6941. doi: 10.1126/sciadv.abi6941.
- 1562 51. Patterson N, Price AL, Reich D. Population structure and eigenanalysis, *PLoS Genet.* **2** (2006)  
1563 e190. doi: 10.1371/journal.pgen.0020190.
- 1564 52. Patterson N, Moorjani P, Luo Y, Mallick S, Rohland N, Zhan Y, Genschoreck T, Webster T, Reich  
1565 D. Ancient admixture in human history, *Genetics*. **192** (2012) 1065–1093. doi:  
1566 10.1534/genetics.112.145037.

- 1567 53. Patterson N, Isakov M, Booth T, Büster L, Fischer CE, Olalde I, Ringbauer H, Akbari A, Cheronet  
1568 O, Bleasdale M, Adamski N, Altena E, Bernardos R, Brace S, Broomandkhoshbacht N, Callan K,  
1569 Candilio F, Culleton B, Curtis E, Demetz L, Carlson KSD, Edwards CJ, Fernandes DM, Foody MGB,  
1570 Freilich S, Goodchild H, Kearns A, Lawson AM, Lazaridis I, Mah M, Mallick S, Mandl K, Micco A,  
1571 Michel M, Morante GB, Oppenheimer J, Özdoğan KT, Qiu L, Schattke C, Stewardson K, Workman  
1572 JN, Zalzalá F, Zhang Z, Agustí B, Allen T, Almássy K, Amkreutz L, Ash A, Baillif-Ducros C, Barclay A,  
1573 Bartosiewicz L, Baxter K, Bernert Z, Blažek J, Bodružić M, Boissinot P, Bonsall C, Bradley P,  
1574 Brittain M, Brookes A, Brown F, Brown L, Brunning R, Budd C, Burmaz J, Canet S, Carnicero-  
1575 Cáceres S, Čaušević-Bully M, Chamberlain A, Chauvin S, Clough S, Čondić N, Coppa A, Craig O,  
1576 Črešnar M, Cummings V, Czifra S, Danielisová A, Daniels R, Davies A, de Jersey P, Deacon J,  
1577 Deminger C, Ditchfield PW, Dizdar M, Dobeš M, Dobisíková M, Domboróczki L, Drinkall G, Đukić  
1578 A, Ernée M, Evans C, Evans J, Fernández-Götz M, Filipović S, Fitzpatrick A, Fokkens H, Fowler C,  
1579 Fox A, Gallina Z, Gamble M, González Morales MR, González-Rabanal B, Green A, Gyenesei K,  
1580 Habermehl D, Hajdu T, Hamilton D, Harris J, Hayden C, Hendriks J, Hernu B, Hey G, Horňák M,  
1581 Ilon G, Istvánovits E, Jones AM, Kavur MB, Kazek K, Kenyon RA, Khreisheh A, Kiss V, Kleijne J,  
1582 Knight M, Kootker LM, Kovács PF, Kozubová A, Kulcsár G, Kulcsár V, Le Penne C, Legge M,  
1583 Leivers M, Loe L, López-Costas O, Lord T, Los D, Lyall J, Marín-Arroyo AB, Mason P, Matošević D,  
1584 Maxted A, McIntyre L, McKinley J, McSweeney K, Meijlink B, Mende BG, Menđušić M, Metlička  
1585 M, Meyer S, Mihovilić K, Milasinovic L, Minnitt S, Moore J, Morley G, Mullan G, Musilová M, Neil  
1586 B, Nicholls R, Novak M, Pala M, Papworth M, Paresys C, Patten R, Perkić D, Pesti K, Petit A,  
1587 Petriščáková K, Pichon C, Pickard C, Pilling Z, Price TD, Radović S, Redfern R, Resutík B, Rhodes  
1588 DT, Richards MB, Roberts A, Roefstra J, Sankot P, Šefčáková A, Sheridan A, Skae S, Šmolíková M,  
1589 Somogyi K, Somogyvári Á, Stephens M, Szabó G, Szécsényi-Nagy A, Szeniczey T, Tabor J, Tankó K,  
1590 Maria CT, Terry R, Teržan B, Teschler-Nicola M, Torres-Martínez JF, Trapp J, Turle R, Ujvári F, van  
1591 der Heiden M, Veleminsky P, Veselka B, Vytlačil Z, Waddington C, Ware P, Wilkinson P, Wilson L,  
1592 Wiseman R, Young E, Zaninović J, Žitňan A, Lalueza-Fox C, de Knijff P, Barnes I, Halkon P, Thomas  
1593 MG, Kennett DJ, Cunliffe B, Lillie M, Rohland N, Pinhasi R, Armit I, Reich D. Large-scale migration  
1594 into Britain during the Middle to Late Bronze Age, *Nature*. **601** (2022) 588–594. doi:  
1595 10.1038/s41586-021-04287-4.
- 1596 54. Peter BM. Admixture, Population Structure, and *F*-Statistics, *Genetics*. **202** (2016) 1485–1501.  
1597 doi: 10.1534/genetics.115.183913.
- 1598 55. Podani J, Miklós I. Resemblance coefficients and the horseshoe effect in Principal Coordinates  
1599 Analysis, *Ecology*. **83** (2002) 3331–3343. doi: 10.1890/0012-  
1600 9658(2002)083[3331:RCATHE]2.0.CO;2.

- 1601 56. Prendergast ME, Lipson M, Sawchuk EA, Olalde I, Ogola CA, Rohland N, Sirak KA, Adamski N,  
1602 Bernardos R, Broomandkhoshbacht N, Callan K, Culleton BJ, Eccles L, Harper TK, Lawson AM,  
1603 Mah M, Oppenheimer J, Stewardson K, Zalzal F, Ambrose SH, Ayodo G, Gates HL Jr, Gidna AO,  
1604 Katongo M, Kwekason A, Mabulla AZP, Mudenda GS, Ndiema EK, Nelson C, Robertshaw P,  
1605 Kennett DJ, Manthi FK, Reich D. Ancient DNA reveals a multistep spread of the first herders into  
1606 sub-Saharan Africa. *Science*. **365** (2019) eaaw6275. doi: 10.1126/science.aaw6275.
- 1607 57. Raghavan M, Skoglund P, Graf KE, Metspalu M, Albrechtsen A, Moltke I, Rasmussen S, Stafford  
1608 TW Jr, Orlando L, Metspalu E, Karmin M, Tambets K, Rootsi S, Mägi R, Campos PF, Balanovska E,  
1609 Balanovsky O, Khusnutdinova E, Litvinov S, Osipova LP, Fedorova SA, Voevoda MI, DeGiorgio M,  
1610 Sicheritz-Ponten T, Brunak S, Demeshchenko S, Kivisild T, Villems R, Nielsen R, Jakobsson M,  
1611 Willerslev E. Upper Palaeolithic Siberian genome reveals dual ancestry of Native Americans.  
1612 *Nature*. **505** (2014) 87–91. doi: 10.1038/nature12736.
- 1613 58. Rasmussen M, Li Y, Lindgreen S, Pedersen JS, Albrechtsen A, Moltke I, Metspalu M, Metspalu E,  
1614 Kivisild T, Gupta R, Bertalan M, Nielsen K, Gilbert MT, Wang Y, Raghavan M, Campos PF, Kamp  
1615 HM, Wilson AS, Gledhill A, Tridico S, Bunce M, Lorenzen ED, Binladen J, Guo X, Zhao J, Zhang X,  
1616 Zhang H, Li Z, Chen M, Orlando L, Kristiansen K, Bak M, Tommerup N, Bendixen C, Pierre TL,  
1617 Grønnow B, Meldgaard M, Andreasen C, Fedorova SA, Osipova LP, Higham TF, Ramsey CB,  
1618 Hansen TV, Nielsen FC, Crawford MH, Brunak S, Sicheritz-Pontén T, Villems R, Nielsen R, Krogh  
1619 A, Wang J, Willerslev E. Ancient human genome sequence of an extinct Palaeo-Eskimo. *Nature*.  
1620 **463** (2010) 757–762. doi: 10.1038/nature08835.
- 1621 59. Reich D, Price AL, Patterson N. Principal component analysis of genetic data, *Nat. Genet.* **40**  
1622 (2008) 491–492.
- 1623 60. Reich D, Thangaraj K, Patterson N, Price AL, Singh L. Reconstructing Indian population history,  
1624 *Nature*. **461** (2009) 489–494. doi: 10.1038/nature08365.
- 1625 61. Reich D, Patterson N, Campbell D, Tandon A, Mazieres S, Ray N, Parra MV, Rojas W, Duque C,  
1626 Mesa N, García LF, Triana O, Blair S, Maestre A, Dib JC, Bravi CM, Bailliet G, Corach D, Hünemeier  
1627 T, Bortolini MC, Salzano FM, Petzl-Erler ML, Acuña-Alonzo V, Aguilar-Salinas C, Canizales-  
1628 Quinteros S, Tusié-Luna T, Riba L, Rodríguez-Cruz M, Lopez-Alarcón M, Coral-Vazquez R, Canto-  
1629 Cetina T, Silva-Zolezzi I, Fernandez-Lopez JC, Contreras AV, Jimenez-Sanchez G, Gómez-Vázquez  
1630 MJ, Molina J, Carracedo A, Salas A, Gallo C, Poletti G, Witonsky DB, Alkorta-Aranburu G, Sukernik  
1631 RI, Osipova L, Fedorova SA, Vasquez R, Villena M, Moreau C, Barrantes R, Pauls D, Excoffier L,  
1632 Bedoya G, Rothhammer F, Dugoujon JM, Larrouy G, Klitz W, Labuda D, Kidd J, Kidd K, Di Rienzo  
1633 A, Freimer NB, Price AL, Ruiz-Linares A. Reconstructing Native American population history,  
1634 *Nature*. **488** (2012) 370–374. doi: 10.1038/nature11258.

- 1635 62. Ringbauer H, Coop G, Barton NH. Inferring Recent Demography from Isolation by Distance of  
1636 Long Shared Sequence Blocks, *Genetics*. **205** (2017) 1335–1351. doi:  
1637 10.1534/genetics.116.196220.
- 1638 63. Scally A, Durbin R. Revising the human mutation rate: implications for understanding human  
1639 evolution, *Nat. Rev. Genet.* **13** (2012) 745–753. doi: 10.1038/nrg3295.
- 1640 64. Sirak KA, Fernandes DM, Lipson M, Mallick S, Mah M, Olalde I, Ringbauer H, Rohland N, Hadden  
1641 CS, Harney É, Adamski N, Bernardos R, Broomandkhoshbacht N, Callan K, Ferry M, Lawson AM,  
1642 Michel M, Oppenheimer J, Stewardson K, Zalzal F, Patterson N, Pinhasi R, Thompson JC, Van  
1643 Gerven D, Reich D. Social stratification without genetic differentiation at the site of Kulubnarti in  
1644 Christian Period Nubia, *Nat. Commun.* **12** (2021) 7283. doi: 10.1038/s41467-021-27356-8.
- 1645 65. Skoglund P, Thompson JC, Prendergast ME, Mittnik A, Sirak K, Hajdinjak M, Salie T, Rohland N,  
1646 Mallick S, Peltzer A, Heinze A, Olalde I, Ferry M, Harney E, Michel M, Stewardson K, Cerezo-  
1647 Román JI, Chiumia C, Crowther A, Gomani-Chindebvu E, Gidna AO, Grillo KM, Helenius IT,  
1648 Hellenthal G, Helm R, Horton M, López S, Mabulla AZP, Parkington J, Shipton C, Thomas MG,  
1649 Tibesasa R, Welling M, Hayes VM, Kennett DJ, Ramesar R, Meyer M, Pääbo S, Patterson N,  
1650 Morris AG, Boivin N, Pinhasi R, Krause J, Reich D. Reconstructing Prehistoric African Population  
1651 Structure, *Cell*. **171** (2017) 59–71.e21. doi: 10.1016/j.cell.2017.08.049.
- 1652 66. Soraggi S, Wiuf C. General theory for stochastic admixture graphs and  $F$ -statistics, *Theor. Popul.*  
1653 *Biol.* **125** (2019) 56–66. doi: 10.1016/j.tpb.2018.12.002.
- 1654 67. Taylor WTT, Librado P, American Horse CJ, Shield Chief Gover C, Arterberry J, Afraid of Bear-  
1655 Cook AL, Left Heron H, Yellow Hair RM, Gonzalez M, Means B, High Crane S, Yellow Bull WW,  
1656 Dull Knife B, Afraid of Bear A, Tecumseh Collin C, Ward C, Pasqual TA, Chauvey L, Tonasso-  
1657 Calviere L, Schiavinato S, Seguin-Orlando A, Fages A, Khan N, Der Sarkissian C, Liu X, Wagner S,  
1658 Leonard BG, Manzano BL, O'Malley N, Leonard JA, Bernáldez-Sánchez E, Barrey E, Charliquart L,  
1659 Robbe E, Denoblet T, Gregersen K, Vershinina AO, Weinstock J, Rajić Šikanjić P, Mashkour M,  
1660 Shingiray I, Aury JM, Perdereau A, Alquraishi S, Alfarhan AH, Al-Rasheid KAS, Trbojević Vukičević  
1661 T, Buric M, Sauer E, Lucas M, Brenner-Coltrain J, Bozell JR, Thornhill CA, Monagle V, Perri A,  
1662 Newton C, Hall WE, Conner JL, Le Roux P, Buckser SG, Gabe C, Belardi JB, Barrón-Ortiz CI, Hart IA,  
1663 Ryder C, Sponheimer M, Shapiro B, Southon J, Hibbs J, Faulkner C, Outram A, Patterson Rosa L,  
1664 Palermo K, Solé M, William A, McCrory W, Lindgren G, Brooks S, Eché C, Donnadiou C, Bouchez  
1665 O, Wincker P, Hodgins G, Trabert S, Bethke B, Roberts P, Jones EL, Running Horse Collin Y,  
1666 Orlando L. Early dispersal of domestic horses into the Great Plains and northern Rockies.  
1667 *Science*. **379** (2023) 1316–1323. doi: 10.1126/science.adc9691.
- 1668 68. Tricou T, Tannier E, de Vienne DM. Ghost Lineages Highly Influence the Interpretation of



- 1669 Introgression Tests, *Syst. Biol.* **71** (2022) 1147–1158. doi: 10.1093/sysbio/syac011.
- 1670 69. van de Loosdrecht M, Bouzouggar A, Humphrey L, Posth C, Barton N, Aximu-Petri A, Nickel B,  
1671 Nagel S, Talbi EH, El Hajraoui MA, Amzazi S, Hublin JJ, Pääbo S, Schiffels S, Meyer M, Haak W,  
1672 Jeong C, Krause J. Pleistocene North African genomes link Near Eastern and sub-Saharan African  
1673 human populations. *Science*. **360** (2018) 548–552. doi: 10.1126/science.aar8380.
- 1674 70. Wang K, Goldstein S, Bleasdale M, Clist B, Bostoen K, Bakwa-Lufu P, Buck LT, Crowther A, Dème  
1675 A, McIntosh RJ, Mercader J, Ogola C, Power RC, Sawchuk E, Robertshaw P, Wilmsen EN,  
1676 Petraglia M, Ndiema E, Manthi FK, Krause J, Roberts P, Boivin N, Schiffels S. Ancient genomes  
1677 reveal complex patterns of population movement, interaction, and replacement in sub-Saharan  
1678 Africa, *Sci. Adv.* **6** (2020) eaaz0183. doi: 10.1126/sciadv.aaz0183.
- 1679 71. Wang CC, Yeh HY, Popov AN, Zhang HQ, Matsumura H, Sirak K, Cheronet O, Kovalev A, Rohland  
1680 N, Kim AM, Mallick S, Bernardos R, Tumen D, Zhao J, Liu YC, Liu JY, Mah M, Wang K, Zhang Z,  
1681 Adamski N, Broomandkshobacht N, Callan K, Candilio F, Carlson KSD, Culleton BJ, Eccles L,  
1682 Freilich S, Keating D, Lawson AM, Mandl K, Michel M, Oppenheimer J, Özdoğan KT, Stewardson  
1683 K, Wen S, Yan S, Zalzal F, Chuang R, Huang CJ, Loo H, Shiung CC, Nikitin YG, Tabarev AV,  
1684 Tishkin AA, Lin S, Sun ZY, Wu XM, Yang TL, Hu X, Chen L, Du H, Bayarsaikhan J, Mijiddorj E,  
1685 Erdenebaatar D, Iderkhangai TO, Myagmar E, Kanzawa-Kiriyama H, Nishino M, Shinoda KI,  
1686 Shubina OA, Guo J, Cai W, Deng Q, Kang L, Li D, Li D, Lin R, Nini, Shrestha R, Wang LX, Wei L, Xie  
1687 G, Yao H, Zhang M, He G, Yang X, Hu R, Robbeets M, Schiffels S, Kennett DJ, Jin L, Li H, Krause J,  
1688 Pinhasi R, Reich D. Genomic insights into the formation of human populations in East Asia,  
1689 *Nature*. **591** (2021) 413–419. doi: 10.1038/s41586-021-03336-2.
- 1690 72. Yaka R, Mapelli I, Kaptan D, Doğu A, Chyleński M, Erdal ÖD, Koptekin D, Vural KB, Bayliss A,  
1691 Mazzucato C, Fer E, Çokoğlu SS, Lagerholm VK, Krzewińska M, Karamurat C, Gemici HC, Sevkar A,  
1692 Dağtaş ND, Kılınc GM, Adams D, Munters AR, Sağlıcan E, Milella M, Schotsmans EMJ, Yurtman E,  
1693 Çetin M, Yorulmaz S, Altınışik NE, Ghalichi A, Juras A, Bilgin CC, Günther T, Storå J, Jakobsson M,  
1694 de Kleijn M, Mustafaoğlu G, Fairbairn A, Pearson J, Togan İ, Kayacan N, Marciniak A, Larsen CS,  
1695 Hodder I, Atakuman Ç, Pilloud M, Sürer E, Gerritsen F, Özbal R, Baird D, Erdal YS, Duru G,  
1696 Özbaşaran M, Haddow SD, Knüsel CJ, Götherström A, Özer F, Somel M. Variable kinship patterns  
1697 in Neolithic Anatolia revealed by ancient genomes. *Curr. Biol.* **31** (2021) 2455–2468.e18. doi:  
1698 10.1016/j.cub.2021.03.050.
- 1699 73. Yang MA, Fan X, Sun B, Chen C, Lang J, Ko YC, Tsang CH, Chiu H, Wang T, Bao Q, Wu X, Hajdinjak  
1700 M, Ko AM, Ding M, Cao P, Yang R, Liu F, Nickel B, Dai Q, Feng X, Zhang L, Sun C, Ning C, Zeng W,  
1701 Zhao Y, Zhang M, Gao X, Cui Y, Reich D, Stoneking M, Fu Q. Ancient DNA indicates human  
1702 population shifts and admixture in northern and southern China. *Science*. **369** (2020) 282–288.



1703 doi: 10.1126/science.aba0909.

1704 74. Zhang F, Ning C, Scott A, Fu Q, Bjørn R, Li W, Wei D, Wang W, Fan L, Abuduresule I, Hu X, Ruan  
1705 Q, Niyazi A, Dong G, Cao P, Liu F, Dai Q, Feng X, Yang R, Tang Z, Ma P, Li C, Gao S, Xu Y, Wu S,  
1706 Wen S, Zhu H, Zhou H, Robbeets M, Kumar V, Krause J, Warinner C, Jeong C, Cui Y. The genomic  
1707 origins of the Bronze Age Tarim Basin mummies. *Nature*. **599** (2021) 256–261. doi:  
1708 10.1038/s41586-021-04052-7.
